# Supplementary material for: Plasma Protein Biomarkers Associated with Higher Ovarian Cancer Risk in BRCA1/2 Carriers
Source: Cancers (Basel). 2021 May 11;13(10):2300. doi: 10.3390/cancers13102300 (PMC8150736; doi:10.3390/cancers13102300)
Supplement: Supplementary file 1 [file cancers-13-02300-s001.zip]

Archive with 7 entries (7 files):
- Supplementary Methods.pdf
- Supplementary table S1.xlsx
- Supplementary table S2.xlsx
- Supplementary table S3.xlsx
- Supplementary table S4.xlsx
- Supplementary table S5.xlsx
- Supplementary_figures.pdf
