# Supplementary material for: Plasma Protein Biomarkers Associated with Higher Ovarian Cancer Risk in BRCA1/2 Carriers
Source: Cancers (Basel). 2021 May 11;13(10):2300. doi: 10.3390/cancers13102300 (PMC8150736; doi:10.3390/cancers13102300)
Supplement: Supplementary file 1 [file cancers-13-02300-s001.zip › Supplementary table S1.xlsx]

## Sheet: Sheet1
Supplementary Table S1. Number of identified proteins and their raw abundance levels determined from duplicate LC-MS/MS runs with the 40 clinical samples.
Information											Uniprot Accesion Number
Sample Name	Experiment number	Disease	BRCA variant type	Mutation	Accession (NCBI ClinVar)	Intepretation (ClinVar)	Familiy history	Personal histroy	Age	Stage	P30044	P02652	P48739-3	O75563	Q8N4C9	P07339	Q9Y3I1	P05362	Q15819	P02647	P11047	Q15063-2	P28676	P17301	P28906	P02741	Q86YW5	P52790	P69891	P00338-3	P07195	P14317	Q8IZ16	P51858-3	Q96QR1	Q06481	P02675	Q12906-7	Q3ZCW2	Q9ULZ3	P02787	Q8TER0	O00339	P20774	P0DP23	P02724	P54802	P06310	Q10469
HPwt1	E01	Healthy	NA	NA	NA	NA	NA	NA	36	NA	NA	3.32845e+07	NA	NA	NA	5.13613e+08	NA	410804968	NA	35325610633	72469062	25561366	NA	NA	5.80458e+06	2391672317	556327315	NA	22820366	234078505	866589865	NA	NA	NA	NA	NA	14595288415	NA	2.76833e+07	NA	111032000000	161075200	NA	91128640	51799277	NA	128004725	124213552	9674948
HPwt1	E02	Healthy	NA	NA	NA	NA	NA	NA	36	NA	NA	3.99354e+07	NA	NA	17313376	571845257	NA	677495964	NA	38555817009	122485334	1.12924e+07	NA	7852983	NA	2578323641	795413609	NA	2.94336e+07	245502658	7.90739e+08	NA	NA	NA	NA	5.26955e+06	14618354914	NA	7.36933e+06	NA	95152185767	143907776	NA	95672288	75132438	515053568	126967750	127755003	NA
HPwt2	E01	Healthy	NA	NA	NA	NA	NA	NA	53	NA	NA	1.39365e+08	NA	NA	NA	735412004	NA	471184273	NA	60834694977	57553013	13267279	NA	16171795	5509105	6.16711e+07	108288948	NA	9.23479e+07	1.5052e+08	844031288	NA	NA	NA	NA	NA	1335829077	NA	NA	NA	401394000000	36463008	NA	53634676	7.33013e+06	NA	267625057	49795746	NA
HPwt2	E02	Healthy	NA	NA	NA	NA	NA	NA	53	NA	NA	1.17364e+08	NA	NA	9462528	5.16364e+08	NA	5.71677e+08	NA	56339582099	44010494	17891998	NA	22096814	8803798	7.1292e+07	87373157	NA	NA	211128296	8.06065e+08	NA	3.81941e+06	NA	NA	5180948	7.35306e+08	15473937	NA	NA	314496000000	73203504	7.99279e+06	44257056	34233030	704693056	243024437	4.76757e+07	10034157
HPwt3	E01	Healthy	NA	NA	NA	NA	NA	NA	49	NA	NA	6.8665e+07	NA	NA	NA	4.88011e+08	NA	3.7742e+08	NA	34632864484	93454055	14480296	NA	11058147	7994449	176592760	6.37318e+08	NA	22683668	1.89338e+08	7.92149e+08	NA	NA	NA	NA	NA	6.53894e+08	NA	1.87908e+07	NA	436053000000	NA	NA	62279824	5.22064e+07	NA	98850143	98453342	9428753
HPwt3	E02	Healthy	NA	NA	NA	NA	NA	NA	49	NA	NA	1.16261e+08	NA	9048800	NA	4.09696e+08	NA	883230525	NA	46209885529	79110212	15087114	NA	26635502	5555753	207185760	5.47577e+08	NA	12753119	349006691	9.23339e+08	NA	NA	NA	3.70816e+06	21646287	4.75619e+08	20535314	NA	NA	381409000000	7.9642e+07	NA	52498840	56726350	815539840	1.77088e+08	90259711	11044895
HPwt4	E01	Healthy	NA	NA	NA	NA	NA	NA	45	NA	NA	7.20783e+07	NA	8.14156e+06	NA	360070278	NA	5.6387e+08	NA	26386587260	3.24745e+07	12269694	NA	NA	NA	237784160	851325096	NA	9087081	2.43652e+08	973545803	NA	NA	NA	NA	2625731	8.94688e+08	NA	33246467	NA	538999000000	NA	NA	62431104	66227739	NA	72936941	156037180	10225840
HPwt4	E02	Healthy	NA	NA	NA	NA	NA	NA	45	NA	NA	7.03383e+07	NA	6.70145e+06	3.67068e+06	3.57749e+08	NA	6.6623e+08	NA	35513261188	4.06297e+07	NA	NA	4.21926e+06	NA	218591958	8.49399e+08	NA	6.64796e+06	243982114	777154443	NA	NA	NA	NA	5.74425e+06	8.14982e+08	3.42965e+06	3.76695e+07	NA	476375000000	48550396	NA	61055956	68531349	359926336	9.43267e+07	8.59528e+07	12770692
HPwt5	E01	Healthy	NA	NA	NA	NA	NA	NA	30	NA	NA	3.36841e+07	NA	3.46903e+06	NA	536425271	NA	4.17289e+08	NA	28613445615	9.90783e+07	13932791	NA	8640868	NA	6.5492e+07	6.15373e+08	NA	NA	1.40762e+08	6.56129e+08	NA	NA	NA	NA	7.53128e+06	7.51862e+08	NA	49242969	NA	235072000000	NA	NA	60889236	14577859	NA	1.06532e+08	42502512	7415792
HPwt5	E02	Healthy	NA	NA	NA	NA	NA	NA	30	NA	NA	3.22839e+07	NA	9313188	NA	448506186	NA	497454643	NA	37431015940	7.71566e+07	NA	NA	8341039	5383460	6.15871e+07	624123074	NA	NA	191264815	645355206	NA	NA	NA	NA	6325618	5.0206e+08	41262260	19007250	NA	205454000000	44367052	NA	62265659	45077934	248843232	115453159	20187108	5987288
HPwt6	E01	Healthy	NA	NA	NA	NA	NA	NA	32	NA	6012174	3.58727e+07	NA	40982064	8443821	730763233	NA	717855114	NA	29129064528	64933521	25962040	NA	NA	10792109	4.03771e+07	1238265204	6548400	8402910	3.2916e+08	1277184323	NA	NA	NA	NA	5470914	6.75421e+08	NA	31158813	NA	213036000000	17226040	NA	58801664	108867997	88107200	136705809	41974860	5418210
HPwt6	E02	Healthy	NA	NA	NA	NA	NA	NA	32	NA	2.75178e+06	1.84984e+07	NA	11885211	NA	506659356	NA	6.28033e+08	NA	23089151827	6.96933e+07	6734119	NA	17713220	2802583	3.72798e+07	1280837863	NA	NA	2.83575e+08	9.79348e+08	NA	NA	NA	NA	4.97474e+06	434256190	NA	20132145	NA	164986000000	44019316	NA	56689084	8.67463e+07	402742880	1.80266e+08	33853024	8070042
HPwt7	E01	Healthy	NA	NA	NA	NA	NA	NA	37	NA	NA	132518808	NA	4.06456e+06	NA	344841436	NA	1684249914	NA	53992582655	7.63148e+07	16687951	NA	36223936	17376076	126367160	5.02766e+08	NA	7.56382e+06	261770778	828330708	NA	NA	NA	NA	5418197	2.93396e+08	1.14441e+07	NA	NA	383869000000	26108472	NA	45055636	6.81072e+06	NA	115253378	78480452	11004544
HPwt7	E02	Healthy	NA	NA	NA	NA	NA	NA	37	NA	NA	7.61325e+07	NA	NA	NA	2.70916e+08	NA	1144084763	NA	42448412497	42170499	3.24117e+06	NA	21692920	12879604	1.10002e+08	172198103	17635518	7.45272e+06	1.77644e+08	6.4735e+08	NA	NA	NA	NA	5641821	1.91306e+08	18307724	NA	NA	283934000000	43701476	NA	33903204	10165306	145064784	6.99292e+07	6.00672e+07	4.27085e+06
HPwt8	E01	Healthy	NA	NA	NA	NA	NA	NA	62	NA	NA	127089098	NA	NA	NA	430774979	NA	889349142	NA	55394074974	6.85049e+07	3814791	NA	45156480	8659652	960343951	260708620	NA	4.61886e+06	230488024	965499034	NA	NA	NA	NA	NA	2.83785e+08	16020225	NA	NA	225112000000	41835584	12286354	41443280	21542833	785182272	1.18742e+08	30939334	9924862
HPwt8	E02	Healthy	NA	NA	NA	NA	NA	NA	62	NA	NA	9.85757e+07	NA	3.03175e+06	NA	3.61756e+08	NA	8.23023e+08	NA	45148283558	5.15119e+07	NA	NA	28416260	5.38475e+06	823029388	31394242	NA	NA	264075479	8.96364e+08	NA	NA	NA	NA	1.75507e+06	2.44929e+08	23446542	NA	NA	169013000000	37790592	15157181	36697332	1.03987e+07	321330656	1.01212e+08	23592144	NA
HPwt9	E01	Healthy	NA	NA	NA	NA	NA	NA	40	NA	NA	4.22489e+08	NA	NA	NA	3.19492e+08	NA	687108827	NA	150571000000	7.09224e+07	9.06724e+06	NA	19212874	11367366	272646644	2.63258e+08	NA	22074850	161533766	6.54715e+08	NA	2764755	NA	NA	7.50504e+06	8.29253e+08	NA	NA	NA	587529000000	45425936	11008175	47682512	6.15568e+07	413373280	1.26248e+08	664515648	NA
HPwt9	E02	Healthy	NA	NA	NA	NA	NA	NA	40	NA	NA	2.75941e+08	NA	2.24856e+06	NA	2.11618e+08	NA	6.56892e+08	NA	156684000000	3.8338e+07	NA	NA	23147174	7383100	2.13732e+08	404253578	NA	21082837	1.72935e+08	6.09694e+08	NA	NA	NA	2.41186e+06	4116427	8.46064e+08	NA	NA	NA	521088000000	41053048	8465060	31458614	77633983	175283520	86136019	418678284	NA
HPwt10	E01	Healthy	NA	NA	NA	NA	NA	NA	33	NA	NA	8.28449e+07	NA	4.59472e+06	14025779	4.04005e+08	6428257	714780656	NA	46577902674	50140477	1.15103e+07	NA	NA	NA	249092523	236148316	NA	NA	205327272	578860296	NA	NA	NA	NA	2.17206e+06	9.69225e+08	21369558	10241033	NA	380116000000	38955296	NA	50508332	27254340	607739392	121443836	243477090	NA
HPwt10	E02	Healthy	NA	NA	NA	NA	NA	NA	33	NA	NA	3.44823e+07	NA	NA	3.86477e+06	3.19521e+08	NA	551539730	NA	42311448384	4.23678e+07	NA	NA	7350466	NA	1.47111e+08	309525889	NA	NA	1.4086e+08	4.68227e+08	NA	NA	NA	NA	701006	609027858	7.59994e+06	3.109e+06	NA	278410000000	22326922	10076819	38451568	22974536	430142400	7.18798e+07	106275382	5.81102e+06
HPvar1	E01	Healthy	BRCA2	c.6952C>T	RCV000031658.8	Pathogenic	Grandmother: breast cancer, Aunt: breast cancer	NA	36	NA	NA	5.01672e+08	NA	NA	14719599	626338320	NA	4.30211e+08	NA	237891000000	1.08334e+08	NA	NA	28671600	16041756	485118069	15380568	NA	NA	259386742	8.71222e+08	NA	NA	NA	4.773e+06	NA	70583775021	NA	NA	NA	1013030000000	2670539648	NA	54524880	NA	NA	140105857	234816552	6679772
HPvar1	E02	Healthy	BRCA2	c.6952C>T	RCV000031658.8	Pathogenic	Grandmother: breast cancer, Aunt: breast cancer	NA	36	NA	NA	7.52977e+08	NA	NA	NA	5.41386e+08	NA	7.4875e+08	NA	232666000000	116247750	18464822	NA	14162184	22788474	477928310	1.32349e+07	NA	6.51164e+06	2.92442e+08	6.55242e+08	NA	NA	NA	5.86133e+06	NA	52545405801	NA	NA	NA	924807000000	3176420480	11157138	55659688	98226872	378807904	1.57447e+08	128586574	NA
HPvar2	E01	Healthy	BRCA1	c.5260G>T	RCV000112584.3	Pathogenic	Sister: ovarian cancer	NA	53	NA	NA	4.31337e+08	NA	NA	38026676	6.23195e+08	NA	478247900	NA	145836000000	77052335	NA	NA	15799605	21958082	316220013	172132846	NA	5985290	3.12188e+08	1037257437	NA	NA	NA	4947424	NA	58373299299	NA	NA	NA	552424000000	3243703808	NA	30407916	NA	NA	1.26122e+08	152528340	9725873
HPvar2	E02	Healthy	BRCA1	c.5260G>T	RCV000112584.3	Pathogenic	Sister: ovarian cancer	NA	53	NA	NA	4.66576e+08	NA	NA	8.19195e+06	417195747	NA	1030686080	NA	137081000000	5.02513e+07	1.12066e+07	NA	22056706	11567031	361618017	25040946	NA	8.1705e+06	249990796	841346445	NA	NA	NA	NA	NA	52003703861	NA	NA	NA	548907000000	2800072960	NA	50457704	7.02174e+07	754438528	100176744	147028608	NA
HPvar3	E01	Healthy	BRCA1	c.2183G>C	RCV000129301.6	Uncertain significance	Mother: ovarian cancer	NA	49	NA	NA	2557367370	NA	NA	NA	605765451	NA	5.15638e+08	NA	408708000000	60965882	NA	NA	NA	31915124	136696215	1.01158e+07	NA	NA	2.50433e+08	8.62371e+08	NA	NA	NA	53830300	NA	55653975437	NA	NA	NA	1040790000000	3137099008	NA	54754916	62809032	NA	111895651	67751782	7513676
HPvar3	E02	Healthy	BRCA1	c.2183G>C	RCV000129301.6	Uncertain significance	Mother: ovarian cancer	NA	49	NA	NA	2352012972	NA	NA	NA	4.37125e+08	NA	877006246	NA	453749000000	1.84763e+08	NA	NA	16909802	36290788	155680672	NA	NA	14034371	226371794	9.4728e+08	NA	NA	NA	60789728	NA	50596202308	NA	NA	NA	1050670000000	3094811392	NA	64137268	160555424	783447360	163268800	79557044	NA
HPvar4	E01	Healthy	BRCA1	exon 5~9 deletion	NA	NA	Mother: ovarian cancer	NA	45	NA	NA	2.51235e+08	NA	NA	54595288	454182691	NA	438721445	NA	107260000000	73217992	18194706	NA	5023319	9651762	100326305	4.83132e+06	NA	5.61927e+06	1.38919e+08	855000153	NA	NA	NA	3.19746e+06	NA	53607811347	NA	4497945	NA	958361000000	1372049472	NA	79425968	121425998	NA	65541359	147646138	6175944
HPvar4	E02	Healthy	BRCA1	exon 5~9 deletion	NA	NA	Mother: ovarian cancer	NA	45	NA	NA	1.63037e+08	NA	NA	NA	3.45175e+08	NA	505535578	NA	98535559066	3.78647e+07	3.44107e+06	NA	4.10131e+06	8855328	5.51511e+07	40729828	NA	4771346	1.42833e+08	6.19482e+08	NA	NA	NA	3344728	NA	38288243886	NA	NA	NA	724599000000	1260286912	NA	79068016	92734657	186238016	2.54223e+07	77583793	7.97969e+06
HPvar5	E01	Healthy	BRCA1	c.4932_4933dup	VCV000254459.2	Pathogenic	Mother: ovarian cancer, Cousin: breast cancer	NA	30	NA	NA	8.07719e+08	NA	NA	16120124	436514215	NA	4.15918e+08	NA	197278000000	67498347	13538940	NA	6721217	16406374	5.34324e+07	NA	NA	20312489	1.8793e+08	9.58478e+08	NA	NA	NA	16742015	NA	57479215652	NA	4.72668e+06	NA	874230000000	2158302528	NA	51550868	119680069	NA	8.79641e+07	94658264	5.13273e+06
HPvar5	E02	Healthy	BRCA1	c.4932_4933dup	VCV000254459.2	Pathogenic	Mother: ovarian cancer, Cousin: breast cancer	NA	30	NA	NA	7.8669e+08	NA	NA	NA	427790084	NA	951563246	NA	220284000000	40319480	12095304	NA	9215540	23796328	5.79718e+07	41058074	NA	22388018	2.91757e+08	1223953383	NA	NA	NA	11227206	NA	45954117742	NA	NA	NA	706169000000	2834060480	NA	54833252	193459630	498320032	138229493	73167912	6.66223e+06
HPvar6	E01	Healthy	BRCA2	c.1909+22del	VCV000132782.4	Conflicting interpretations of pathogenicity​	Sister: ovarian cancer	NA	32	NA	NA	4.32412e+08	NA	4.08345e+06	5.10483e+06	481239775	NA	5.66159e+08	NA	250675000000	43963869	NA	NA	NA	20366242	908702474	54167940	NA	142497872	2.35923e+08	9.17858e+08	NA	NA	NA	7145012	NA	69510248042	NA	4.59655e+06	NA	574300000000	3424418432	NA	61437984	120730050	NA	41528490	188833634	9180330
HPvar6	E02	Healthy	BRCA2	c.1909+22del	VCV000132782.4	Conflicting interpretations of pathogenicity​	Sister: ovarian cancer	NA	32	NA	2384973	4.36336e+08	NA	NA	9443932	4.63184e+08	NA	9.51848e+08	NA	249595000000	47572328	NA	NA	11480432	17068938	735284539	65315183	NA	93458888	2.39323e+08	8.81623e+08	NA	NA	NA	7.8057e+06	NA	58567439957	NA	NA	NA	497619000000	3416003328	12711010	46616224	1.37552e+08	263722688	5.88998e+07	149156896	11714794
HPvar7	E01	Healthy	BRCA2	c.8092G>A	VCV000038138.13	Conflicting interpretations of pathogenicity​	Aunt: breast cancer	NA	37	NA	NA	337447981	NA	NA	NA	624988672	NA	5.23207e+08	NA	119119000000	4.94184e+07	18384396	NA	NA	9306562	409736394	3.78663e+06	NA	50631085	2.22961e+08	678024116	NA	NA	NA	NA	NA	64930969607	NA	NA	NA	791575000000	2239596864	31068188	47276584	42520150	NA	64861598	328693608	16923866
HPvar7	E02	Healthy	BRCA2	c.8092G>A	VCV000038138.13	Conflicting interpretations of pathogenicity​	Aunt: breast cancer	NA	37	NA	1.60295e+06	270772134	NA	NA	4.02913e+06	3.14314e+08	NA	816354174	NA	90574907768	40343785	4.4083e+06	NA	7.40181e+06	13072954	3.781e+08	NA	NA	3.68163e+07	1.76482e+08	566859662	NA	NA	NA	NA	NA	44244769810	NA	NA	NA	600800000000	1311529248	NA	33814204	9.43208e+07	NA	65915886	222936532	11903518
HPvar8	E01	Healthy	BRCA1	c.3756_3759delGTCT	RCV000167859.9	Pathogenic	Mother: leukemia, Aunt: breast cancer	NA	62	NA	NA	248402086	NA	NA	6.6049e+06	6.16619e+08	NA	655194466	NA	44359415074	5.24932e+07	11537192	NA	9952995	10593548	301265104	5817628	NA	18600267	403128980	852123236	NA	NA	NA	NA	NA	69627438964	NA	2.20218e+06	NA	596446000000	1944176704	NA	39351620	48791556	NA	143988081	162545460	7190058
HPvar8	E02	Healthy	BRCA1	c.3756_3759delGTCT	RCV000167859.9	Pathogenic	Mother: leukemia, Aunt: breast cancer	NA	62	NA	NA	1.06412e+08	NA	NA	4573147	437920208	NA	5.40601e+08	NA	35330058744	33930046	2.82628e+06	NA	9547434	NA	263699251	NA	NA	2133148	229150677	6.15765e+08	NA	NA	NA	NA	NA	46048570208	NA	NA	NA	420812000000	1586825408	NA	27129952	4.12726e+07	568419136	95519645	119990886	5058280
HPvar9	E01	Healthy	BRCA2	c.154C>T	VCV000037421.12	Conflicting interpretations of pathogenicity​	Mother: breast cancer	NA	40	NA	NA	8.44959e+08	NA	NA	NA	549878425	260149	924864175	NA	172520000000	59915958	NA	NA	9219620	15369642	209028871	NA	NA	2.77373e+06	384140757	1261670245	405063	NA	NA	NA	NA	76435543155	NA	NA	NA	1541840000000	3843022976	NA	53986196	8743574	NA	99997475	192395136	14322078
HPvar9	E02	Healthy	BRCA2	c.154C>T	VCV000037421.12	Conflicting interpretations of pathogenicity​	Mother: breast cancer	NA	40	NA	NA	3.48362e+08	NA	NA	NA	3.08854e+08	NA	7.57568e+08	NA	124576000000	39658537	5.2849e+06	NA	5.12161e+06	21515794	172587358	39645668	NA	5.18871e+06	2.7321e+08	9.71507e+08	NA	NA	NA	2.28253e+06	NA	47526468592	NA	NA	NA	1044040000000	2876680384	NA	37281440	111588752	388652864	6.2892e+07	133794158	NA
HPvar10	E01	Healthy	BRCA2	c.4829_4830delTG	VCV000051721.8	Pathogenic	Mother: ovarian cancer	NA	33	NA	NA	9.38196e+08	NA	NA	NA	7.92152e+08	NA	1238867322	NA	247600000000	5.4498e+07	8803912	NA	NA	15444705	1974068374	19303034	NA	56754606	3.01074e+08	8.93088e+08	NA	NA	NA	NA	NA	51714470960	3420647	NA	NA	1254550000000	2285567453	12638005	44994872	1.13715e+08	692232768	1.08697e+08	254587608	NA
HPvar10	E02	Healthy	BRCA2	c.4829_4830delTG	VCV000051721.8	Pathogenic	Mother: ovarian cancer	NA	33	NA	NA	5.56558e+08	NA	NA	NA	6.85745e+08	NA	8.68402e+08	NA	158820000000	4.3895e+07	NA	NA	11974552	99334072	1333008359	3.79882e+06	NA	6.43616e+07	2.33567e+08	7.5626e+08	NA	NA	NA	1609729	NA	38432783630	NA	NA	NA	1017000000000	1452946240	NA	34183224	175313822	464196576	8.40736e+07	237259356	4135631
OCwt1	E01	Ovarian Cancer	NA	NA	NA	NA	NA	NA	46	IIIC	43133489	2.93148e+07	NA	1.6887e+07	NA	8.03837e+08	NA	7.06341e+08	NA	9.28463e+08	5.41586e+07	4.45193e+06	NA	NA	NA	3773034188	1126626419	NA	223015335	4.06827e+08	1192953071	NA	26342074	NA	NA	NA	3145844502	NA	101604756	NA	95649028888	54785996	NA	63052268	140866543	NA	36425930	NA	10513445
OCwt1	E02	Ovarian Cancer	NA	NA	NA	NA	NA	NA	46	IIIC	33635592	1.99897e+07	NA	16049280	NA	8.76158e+08	NA	9.89938e+08	NA	1391733931	4.87417e+07	NA	NA	NA	NA	4456943567	3265927060	NA	171696300	4.40116e+08	1138760574	NA	NA	NA	NA	5.97196e+06	3852225736	1.58397e+07	91659276	NA	94364118505	72172487	NA	69208120	244069170	327721728	8.77756e+07	NA	14136757
OCwt2	E01	Ovarian Cancer	NA	NA	NA	NA	NA	NA	68	IIIC	2.2011e+07	4.98666e+07	NA	9950493	20889622	1253144568	NA	923963584	NA	6185369018	159861719	2.43636e+07	NA	NA	NA	6221645196	876853044	NA	6.26039e+06	356111518	947281182	NA	NA	NA	NA	NA	1457263013	NA	35323035	NA	118428000000	61448314	4367740	90475448	56622850	NA	4998870	52737664	NA
OCwt2	E02	Ovarian Cancer	NA	NA	NA	NA	NA	NA	68	IIIC	7690206	4.15161e+07	NA	4186430	NA	1196397697	NA	1342563678	NA	7538946008	1.47305e+08	10098165	NA	NA	3.16396e+06	6809523023	871064392	NA	NA	5.058e+08	9.60504e+08	NA	NA	NA	NA	8601888	1611870952	3.86162e+07	25396654	NA	108817000000	95124496	9926591	59450884	97834595	430963520	47153224	28085940	6763626
OCwt3	E01	Ovarian Cancer	NA	NA	NA	NA	NA	NA	52	Ivb	3.2944e+07	1.42303e+07	NA	NA	NA	6.12983e+08	NA	6.20457e+08	NA	3386330161	3.12663e+07	1268835	NA	NA	NA	16296900120	621230528	1.34765e+07	NA	5.78862e+08	1411966748	73705.6	NA	NA	NA	NA	2980065681	4.71541e+07	9451708	NA	60270241671	19596648	NA	71636656	136765748	NA	2.28023e+07	56842264	6390366
OCwt3	E02	Ovarian Cancer	NA	NA	NA	NA	NA	NA	52	Ivb	24982255	1.82604e+07	NA	12906950	NA	669601785	NA	961042415	NA	3028237908	2.67426e+07	11935655	NA	NA	NA	18506448832	583393842	NA	NA	6.14694e+08	1283020352	NA	NA	NA	NA	576326	2537495989	3.86386e+07	6637709	NA	61726770595	66605668	NA	85967016	80147760	34091812	3.11451e+07	48037216	9366951
OCwt4	E01	Ovarian Cancer	NA	NA	NA	NA	NA	NA	62	IIIC	2.30061e+07	6.55746e+07	NA	14268994	NA	1404310056	NA	878298351	NA	1588266496	8.58273e+07	71272657	NA	NA	NA	4706439215	789825008	NA	NA	2.6949e+08	751336602	NA	NA	NA	NA	NA	7.88974e+08	NA	103774347	NA	10482698781	NA	NA	82798976	89263569	NA	6.9672e+07	38820720	5207886
OCwt4	E02	Ovarian Cancer	NA	NA	NA	NA	NA	NA	62	IIIC	16348294	1.72514e+07	NA	2.67934e+07	NA	1301759677	NA	1009529862	NA	1734883321	84579740	42181020	NA	NA	NA	4646114127	851177414	NA	NA	2.90052e+08	6.60931e+08	NA	NA	NA	NA	6.98555e+06	1014597109	2.39768e+07	83784024	NA	10545196644	9743233	NA	6.19036e+07	162396267	454289856	1.2179e+08	27241798	NA
OCwt5	E01	Ovarian Cancer	NA	NA	NA	NA	NA	NA	69	Ivb	3.42918e+07	1.41688e+07	NA	18863416	NA	1866159119	NA	1244970751	NA	2595265467	1.16899e+08	5.25477e+07	NA	NA	NA	20620959686	936189132	NA	1.0078e+07	4.44512e+08	784530070	NA	NA	NA	NA	NA	1308977742	6.33577e+07	124003182	NA	15257503334	18046912	NA	62012816	9.59882e+07	NA	2.45308e+07	NA	9861763
OCwt5	E02	Ovarian Cancer	NA	NA	NA	NA	NA	NA	69	Ivb	29319900	1.38167e+07	NA	16163319	NA	1846720786	NA	1832294337	NA	2891020753	1.28668e+08	72669526	NA	9598249	NA	25378890167	1164936195	NA	3692406	4.7687e+08	812975160	NA	NA	NA	NA	2.18415e+06	1705842325	5.80077e+07	119865464	NA	18291756896	NA	NA	68241142	1.21406e+08	91291928	50055472	NA	10566715
OCwt6	E01	Ovarian Cancer	NA	NA	NA	NA	NA	NA	53	IIIC	98175000	1.5286e+07	12614552	90689812	NA	8.09119e+08	NA	793194013	NA	4147301832	7.23679e+07	46084250	5418636	NA	NA	3594662735	8.96944e+08	14236012	NA	6.58593e+08	1009252457	NA	55418880	NA	NA	13893751	1964963546	48021121	350579000	8484001	12167686753	2.91104e+07	NA	177221632	1006321145	NA	38446380	NA	6.05867e+06
OCwt6	E02	Ovarian Cancer	NA	NA	NA	NA	NA	NA	53	IIIC	50119308	4.37447e+06	9891615	59341590	8584575	522864387	NA	5.52599e+08	3.70841e+06	2401505746	6.86461e+07	10589147	NA	NA	NA	1634669828	853866070	2.68742e+06	NA	457538992	738240089	NA	34187296	NA	NA	8824380	9.99156e+08	1.15791e+07	257905384	4998096	8317976378	NA	NA	116224864	6.56014e+08	NA	2.45252e+07	NA	2.28888e+06
OCwt7	E01	Ovarian Cancer	NA	NA	NA	NA	NA	NA	53	IIb	5731106	4.18151e+07	NA	10942268	NA	790080873	NA	9.78857e+08	NA	4209762420	79407098	NA	NA	NA	NA	5095722299	3.1187e+08	NA	NA	3.50232e+08	1086900280	NA	NA	NA	NA	NA	1298003312	112641181	5.20051e+07	NA	19006736996	87824044	NA	46403188	2.68155e+08	848894592	118974727	38782004	5.4481e+06
OCwt7	E02	Ovarian Cancer	NA	NA	NA	NA	NA	NA	53	IIb	23378000	1.60529e+07	NA	1.56463e+07	7650070	5.62856e+08	NA	653661639	NA	3301071246	5.37376e+07	10851522	NA	NA	NA	4382407858	290776728	NA	NA	330137350	877191238	NA	NA	NA	NA	NA	1176021361	4.3632e+07	49724254	NA	13653896132	4.99039e+07	NA	46047964	213173385	293739040	7.08865e+07	27473018	6.41914e+06
OCwt8	E01	Ovarian Cancer	NA	NA	NA	NA	NA	NA	62	IIIC	89824648	2.17671e+07	NA	3.56598e+06	4549310	827682675	NA	982516493	NA	1923560558	1.75865e+08	40220850	18670112	NA	NA	60212138788	658007610	43024106	19436356	913814892	1925144490	NA	NA	NA	NA	15047288	83102722391	61700523	8726486	NA	9452879005	2129732480	20146210	20473276	527394955	38517276	32691282	119541296	8.07832e+06
OCwt8	E02	Ovarian Cancer	NA	NA	NA	NA	NA	NA	62	IIIC	8.51814e+07	8.43442e+06	NA	NA	NA	5.50794e+08	NA	874528915	NA	1628024309	2.19671e+08	35547070	NA	NA	NA	54797364131	6.33435e+08	41794842	3418550	693331232	1659695764	NA	NA	NA	NA	32807993	53975445381	54437117	NA	NA	7302355756	1958706112	3.3282e+06	19046082	459735238	365416064	24511474	83101540	4.18881e+06
OCwt9	E01	Ovarian Cancer	NA	NA	NA	NA	NA	NA	65	IIIC	NA	8.26623e+06	NA	NA	NA	1028214907	NA	1329566874	NA	1118987775	9.67581e+07	49309324	4.26504e+06	NA	NA	48550270843	123838092	NA	8672809	2.53764e+08	1137839953	NA	NA	NA	NA	NA	132006000000	51227419	NA	NA	5087560743	5008320896	NA	55198092	20523427	821397696	1.93516e+07	43817608	NA
OCwt9	E02	Ovarian Cancer	NA	NA	NA	NA	NA	NA	65	IIIC	NA	3.90259e+06	NA	NA	NA	804293220	NA	1169842571	NA	1173010933	90225014	5.33558e+06	NA	NA	NA	44598592623	137279066	NA	NA	2.68837e+08	1095627421	NA	NA	NA	NA	NA	93422372171	2.75649e+07	NA	NA	4309105474	4987746688	NA	31216656	8848692	314606880	16203697	16444427	NA
OCwt10	E01	Ovarian Cancer	NA	NA	NA	NA	NA	NA	43	IIIB	2.24856e+07	3.43776e+07	NA	NA	NA	6.40336e+08	16582992	1069585464	NA	9310564711	1.0346e+08	161529107	NA	NA	NA	5673594043	2.34025e+08	NA	61034796	3.89011e+08	1510840610	NA	NA	NA	NA	NA	95370583423	NA	NA	NA	331926000000	3855197696	NA	67989984	369935542	954009600	163016568	138458872	NA
OCwt10	E02	Ovarian Cancer	NA	NA	NA	NA	NA	NA	43	IIIB	5.95602e+06	1.84438e+07	NA	NA	NA	581654238	NA	7.48136e+08	NA	7471611139	7.32048e+07	42449345	NA	NA	NA	3800813100	281285636	NA	5.9523e+07	3.14023e+08	1096385060	NA	NA	10195731	NA	NA	69791890641	NA	NA	NA	248753000000	3088289344	NA	52142960	236706644	525269120	1.02502e+08	54923846	NA
OCvar1	E01	Ovarian Cancer	BRCA1	c.3430C>T	VCV000054883.1	Pathogenic	NA	Concurrent breast cancer	55	IIIC	29932741	1.83177e+07	NA	1.51987e+07	NA	1037166530	3.9606e+06	7.48767e+08	NA	3418529645	1.1603e+08	71849353	NA	NA	NA	29668616581	749346940	20584256	25546406	394493524	1216281252	NA	NA	NA	NA	NA	14406455435	46171945	49392594	NA	128276000000	431395728	NA	59585840	1.73767e+08	NA	3532317	48468412	NA
OCvar1	E02	Ovarian Cancer	BRCA1	c.3430C>T	VCV000054883.1	Pathogenic	NA	Concurrent breast cancer	55	IIIC	30383232	1.3715e+07	NA	21419052	NA	981242388	619748	1214416689	NA	3740343539	93568541	42361101	NA	NA	NA	30808391692	1017380068	210044784	30986308	4.61917e+08	1104402176	NA	NA	NA	NA	1.24034e+07	14205991120	44623008	46071064	NA	122512000000	551703872	NA	125996756	158205638	368158496	1.91958e+07	47335172	NA
OCvar2	E01	Ovarian Cancer	BRCA2	c.6600_6601delTT	VCV000052131.8	Pathogenic	NA	Concurrent breast cancer	64	IIIC	31679851	9.12737e+06	NA	NA	NA	1096158047	NA	667937229	NA	1557558403	58460000	3.14263e+07	NA	NA	NA	48732952199	919109654	NA	1.26047e+08	313670398	1088878507	NA	NA	NA	NA	NA	1948379155	NA	41331120	6671892	8080357773	84955432	NA	90754672	90371175	NA	1.72636e+07	NA	NA
OCvar2	E02	Ovarian Cancer	BRCA2	c.6600_6601delTT	VCV000052131.8	Pathogenic	NA	Concurrent breast cancer	64	IIIC	45502828	9.28313e+06	NA	9422139	NA	1227567797	NA	1514441322	NA	2399103706	1.18773e+08	57598482	NA	NA	NA	61722442720	1121385327	99478584	62332676	4.73463e+08	1372081640	NA	NA	NA	NA	2403563	1660010733	4.38709e+07	31271946	NA	10055316741	139158794	NA	81509600	1.92269e+08	45488992	14104010	NA	9790351
OCvar3	E01	Ovarian Cancer	BRCA2	c.7522>A	VCV000052347.13	Conflicting interpretations of pathogenicity​	NA	Concurrent breast cancer	61	IIIC	36330328	2.69361e+07	NA	18773170	NA	1176425085	1.63885e+07	1157903470	NA	1336916378	126264570	16271637	NA	NA	NA	78325287583	969348269	NA	202930820	3.79051e+08	1149785111	NA	NA	NA	NA	NA	2075558077	29900208	54850076	NA	11938134357	93434728	NA	68025760	1.95484e+08	NA	3.48304e+06	117245478	10058279
OCvar3	E02	Ovarian Cancer	BRCA2	c.7522>A	VCV000052347.13	Conflicting interpretations of pathogenicity​	NA	Concurrent breast cancer	61	IIIC	38928500	1.87441e+07	NA	16940872	NA	1220724951	17101738	2092629892	NA	1702716057	138776473	8.38379e+06	NA	NA	NA	77230688782	1052018828	172970384	113315630	459372637	1078330037	NA	NA	3786475	NA	2.54505e+06	1995277154	27334411	4.24871e+07	NA	14093955951	118315974	NA	63941016	258598095	182947040	14322669	7.67699e+07	10735078
OCvar4	E01	Ovarian Cancer	BRCA2	c.8954-10C>T	VCV000037753.9	Uncertain significance	NA	Concurrent breast cancer	51	IIIC	29908796	6.81338e+06	NA	7.91714e+06	NA	885199591	2.69584e+07	9.55954e+08	NA	9.90432e+08	9.31444e+07	26073173	NA	NA	NA	18740227189	7.73864e+08	101364096	934837879	373726321	2102747596	NA	NA	6.4629e+06	NA	NA	2381406887	33926629	12390658	NA	18796098932	114843396	NA	68868856	1.92808e+08	NA	4870362	39651972	NA
OCvar4	E02	Ovarian Cancer	BRCA2	c.8954-10C>T	VCV000037753.9	Uncertain significance	NA	Concurrent breast cancer	51	IIIC	3.68856e+07	1.34725e+07	NA	1.20791e+07	NA	843888781	2.79073e+07	2204595586	NA	1311267574	9.97216e+07	40120762	NA	NA	NA	23507607964	7.01608e+08	58911316	5.6452e+08	7.36057e+08	2152255358	NA	NA	18283260	NA	5.33092e+06	2014706035	77250819	11253260	NA	19997629405	177568536	NA	50745128	1.89935e+08	338588064	1.92577e+07	35674004	NA
OCvar5	E01	Ovarian Cancer	BRCA2	c.7522>A	VCV000052347.13	Conflicting interpretations of pathogenicity​	Mother: breast cancer	NA	61	IIIC	2.52175e+08	8.48165e+07	2.01581e+06	32861936	NA	7.12577e+08	32250414	9.90865e+08	18720254	2663238378	119371520	NA	30160412	NA	NA	4018653034	964144508	1.04126e+08	2762793578	1561574926	4193309007	10887289	NA	46565960	NA	1.93916e+06	2102590975	47005569	89535472	NA	131977000000	NA	NA	68513824	2421364592	150771584	151840132	89123864	NA
OCvar5	E02	Ovarian Cancer	BRCA2	c.7522>A	VCV000052347.13	Conflicting interpretations of pathogenicity​	Mother: breast cancer	NA	61	IIIC	232664136	5.75781e+07	2097464	28471258	NA	540547486	28620586	8.04473e+08	NA	2421309330	8.30346e+07	NA	37295168	NA	NA	2687677071	8.07731e+08	68957392	2814811305	1221973200	4154933809	8.56916e+06	NA	16071005	NA	6.86792e+06	1092063061	74446740	31425792	NA	104983000000	24594760	NA	42538260	1641607584	454359552	1.32115e+08	6.1527e+07	NA
OCvar6	E01	Ovarian Cancer	BRCA2	c.8954-10C>T	VCV000037753.9	Uncertain significance	Mother: ovarian cancer	NA	52	IIIC	41818907	5.0368e+07	NA	27981839	NA	477697771	9489877	906775822	NA	2839703853	8.72471e+07	24087668	6049081	NA	NA	1091779569	622408820	NA	4172171756	4.30843e+08	1764173508	NA	NA	NA	NA	NA	1148986263	49473850	42000504	NA	143925000000	23107952	NA	59423508	578791790	267400432	9.42631e+07	76030400	11557779
OCvar6	E02	Ovarian Cancer	BRCA2	c.8954-10C>T	VCV000037753.9	Uncertain significance	Mother: ovarian cancer	NA	52	IIIC	36232149	1.61295e+07	NA	21371830	NA	369687976	2.59961e+06	9.04369e+08	11431181	3007923792	6.00833e+07	NA	5925398	NA	NA	1010482428	626689002	4.12293e+06	3699379258	3.73529e+08	1499913403	NA	NA	NA	NA	1.00549e+06	8.98067e+08	4.98601e+07	56666284	NA	130339000000	47569564	NA	58085844	4.7398e+08	299818240	5.48947e+07	44398040	10090546
OCvar7	E01	Ovarian Cancer	BRCA1	p.V1833fs	VCV000125867.1	Pathogenic	NA	NA	55	IIIC	24609337	4.18017e+07	NA	26451808	NA	803866398	NA	1132780152	NA	2673173626	9.85112e+07	NA	NA	7.60215e+06	NA	4.60084e+08	701907847	NA	142224370	240393111	906817799	NA	NA	NA	NA	2.13638e+06	9.20348e+08	1.06524e+07	75557296	NA	87395621095	54534704	NA	35620184	216459802	542068608	90152492	225498212	13011779
OCvar7	E02	Ovarian Cancer	BRCA1	p.V1833fs	VCV000125867.1	Pathogenic	NA	NA	55	IIIC	20781769	1.62059e+07	NA	18070542	NA	5.75346e+08	NA	9.19697e+08	NA	2359337136	8.97533e+07	NA	NA	NA	NA	3.93828e+08	5.5012e+08	39039900	167586728	2.33654e+08	771562686	NA	NA	NA	NA	2.13293e+06	1081021982	19417414	70233910	NA	79332683780	36397528	NA	39450296	229709596	368079488	5.61271e+07	193019348	8494177
OCvar8	E01	Ovarian Cancer	BRCA1	p.N1272fs	VCV000055014.1	Pathogenic	NA	NA	68	Ivb	3.37919e+06	3.91875e+07	NA	NA	NA	1021102240	NA	9.83252e+08	NA	2962894275	134624598	7991460	NA	NA	NA	800990162	474136562	33034750	99335216	3.02582e+08	1305717737	NA	NA	NA	NA	NA	1164095090	NA	23833636	NA	57718073526	NA	NA	71034776	159937918	NA	8.57332e+07	145622633	9090963
OCvar8	E02	Ovarian Cancer	BRCA1	p.N1272fs	VCV000055014.1	Pathogenic	NA	NA	68	Ivb	10747401	1.92097e+07	NA	6473622	NA	8.76863e+08	3293072	893553889	NA	2931410889	1.20501e+08	NA	NA	4385794	NA	6.70012e+08	2545799886	57992468	54754446	2.78134e+08	1144876137	NA	2.83974e+06	NA	NA	NA	9.33859e+08	1.43669e+07	19619767	NA	44446349725	41942824	NA	48409868	116367015	403708416	7.69724e+07	79773238	8088802
OCvar9	E01	Ovarian Cancer	BRCA2	p.R2494*	VCV000038099.16	Pathogenic	NA	NA	54	IIIb	18432582	5.47102e+07	NA	3934050	NA	5.79655e+08	NA	6.87487e+08	NA	23011928525	8.17409e+07	NA	NA	19526820	1.98731e+06	2.62668e+08	3.88509e+08	99974256	3.04298e+07	223054941	817499758	NA	7210559	NA	NA	NA	3132570608	13271876	4042509	NA	83634758028	79236202	NA	51625256	72487203	674519040	89682473	95896521	NA
OCvar9	E02	Ovarian Cancer	BRCA2	p.R2494*	VCV000038099.16	Pathogenic	NA	NA	54	IIIb	NA	2.94071e+07	NA	2.1669e+06	NA	376829334	3.80169e+06	5.11101e+08	NA	22896839823	59559168	NA	NA	11571034	NA	198343122	3.65957e+08	41060524	3.17969e+07	182253626	7.21933e+08	NA	1.45472e+06	NA	NA	3.36764e+06	2891997700	NA	3.11914e+06	NA	71103942734	53366608	NA	45184004	76542798	267411984	7.08695e+07	53154704	NA
OCvar10	E01	Ovarian Cancer	BRCA2	exon 12~13 duplication	NA	NA	NA	NA	70	IIIC	17214728	7.53325e+07	NA	NA	NA	2013528820	NA	1771135112	NA	16249523329	1.51303e+08	33292193	NA	NA	NA	28572584569	361350810	65493560	159710755	775069472	2997997191	NA	NA	NA	NA	1.62339e+07	79007691199	8.22809e+07	NA	NA	40020738039	3492995072	NA	44271900	66784250	569812608	2.10109e+07	105951526	NA
OCvar10	E02	Ovarian Cancer	BRCA2	exon 12~13 duplication	NA	NA	NA	NA	70	IIIC	NA	3.79202e+07	NA	NA	NA	1473121063	NA	1285774669	NA	8809593067	109119488	25787817	NA	NA	NA	24760628667	2.3597e+08	35763744	123903872	673874056	1953719311	NA	7102091	3.21074e+06	NA	3279165	59488673853	3.22522e+07	NA	NA	26187956078	2306606144	NA	24474842	91970217	311952416	1.71417e+07	60883120	NA
HPwt: Healthy subjects without BRCA1/2 carriers
HPvar: Healthy subjects with BRCA1/2 carriers
OCwt: Ovarian cancer patients without BRCA1/2 carriers
OCvar: Ovarian cancer patients with BRCA1/2 carriers
[truncated: 1,466 more columns]
