# Supplementary material for: Plasma Protein Biomarkers Associated with Higher Ovarian Cancer Risk in BRCA1/2 Carriers
Source: Cancers (Basel). 2021 May 11;13(10):2300. doi: 10.3390/cancers13102300 (PMC8150736; doi:10.3390/cancers13102300)
Supplement: Supplementary file 1 [file cancers-13-02300-s001.zip › Supplementary table S2.xlsx]

## Sheet: Sheet1
Supplementary Table S2. Normalized abundance levels of 374 proteins determined from 80 LC-MS/MS runs.
Information				Uniprot Accesion Number
Sample Name	Experiment number	BRCA variant type	Type	P07339	P05362	P11047	P02741	P00338.3	P07195	P20774	P54802	P04180	Q07954	P68133	P35916	P29401.2	P01042	P00748	P05154	P22897	P42785.2	Q04756	O95479	P10643	P27487	P27918	P16070	P04275	Q92859	P06727	Q06830	Q9BY67.3	Q9UJJ9	Q12913	Q9BXR6	P43251.2	O60888.2	P06276	P22692	Q76L83	P07686	P54289	P03952	P24387	P10909.2	P08253	Q9UGM5	P13473.3	P11021
HPwt1	E01	NA	HPwt	28.9361	28.6139	26.1109	31.1554	27.8024	29.6908	26.4414	26.9316	29.1023	28.8363	28.4106	27.9521	27.839	27.2068	33.839	33.0401	29.3664	25.3374	33.1106	27.232	35.4953	29.3406	33.3668	30.0892	33.8548	27.563	37.5921	26.365	27.021	28.2264	29.409	30.7418	31.8145	24.89	31.5026	28.3068	25.7121	25.3955	28.9826	34.7968	25.5369	36.8145	29.2078	33.3393	27.4329	30.569
HPwt1	E02	NA	HPwt	29.091	29.3356	26.868	31.2638	27.8712	29.5586	26.5116	26.9199	28.937	29.0911	29.2573	27.8521	27.3369	25.6371	33.5924	33.421	26.8102	26.3545	32.7407	28.0903	35.4913	29.2874	31.7668	30.1764	33.8051	27.7299	37.8178	27.3574	27.4237	28.177	30.8214	30.5539	31.9799	25.5652	31.756	27.8174	28.2798	25.3151	29.0395	34.8127	26.0729	36.9264	28.9901	33.1901	27.7676	30.7544
HPwt2	E01	NA	HPwt	29.454	28.8117	25.7784	25.8781	27.1654	29.6527	25.6767	27.9956	29.0727	29.4408	28.4713	27.672	26.7036	27.3445	34.0303	33.5034	26.1043	26.3282	33.4922	27.4491	36.2979	30.4293	30.928	30.4321	33.1936	28.1438	37.8223	25.605	28.0766	28.7495	30.5004	30.5715	32.6319	25.6252	31.8754	28.5671	26.7935	23.8306	28.6725	35.303	25.7515	37.5103	29.1845	33.2434	28.3572	30.6653
HPwt2	E02	NA	HPwt	28.9438	29.0906	25.3913	26.0872	27.6535	29.5863	25.3994	27.8565	29.0923	29.4307	28.3423	27.5191	26.9733	25.5278	33.5888	33.592	26.8602	26.6423	33.3189	27.747	36.0971	30.1198	30.6247	30.0626	32.7833	28.0592	37.7865	25.8166	27.5333	28.2128	30.8914	30.4528	32.5306	26.419	32.0141	28.2888	28.5626	23.9187	28.8769	35.0699	26.0961	37.2274	29.1989	33.2203	27.7368	30.5947
HPwt3	E01	NA	HPwt	28.8623	28.4916	26.4778	27.3959	27.4964	29.5612	25.8923	26.5587	28.6521	29.1736	29.171	27.8763	27.9744	26.6087	34.0504	33.2359	27.0006	25.5876	33.1202	27.111	35.78	29.2349	33.1049	30.2391	33.8809	28.3757	38.1356	26.3695	27.6024	28.496	29.8731	30.4908	32.0816	25.4456	31.766	28.1527	26.7231	24.3603	28.6863	35.1706	25.7167	36.8707	29.2387	33.3798	28.0596	30.443
HPwt3	E02	NA	HPwt	28.61	29.7182	26.2374	27.6263	28.3787	29.7823	25.6458	27.3999	29.0404	29.4351	29.0604	27.0795	28.0129	25.5292	33.2088	33.7286	27.119	26.7638	33.2032	27.9074	36.0787	29.3272	31.1437	30.4813	33.8145	27.4175	38.3124	26.1128	27.2446	28.3689	31.0735	30.8211	32.6711	26.1674	32.3211	28.3608	27.8956	25.2579	28.4162	35.3083	26.6252	37.1437	29.1375	33.4628	28.155	30.7688
HPwt4	E01	NA	HPwt	28.4237	29.0708	24.9528	27.8251	27.8602	29.8587	25.8958	26.1201	28.8518	29.3045	28.3361	28.1089	27.38	26.9315	34.3005	32.5881	27.327	25.4004	33.047	27.3807	35.6993	29.8072	32.7047	30.3331	33.9992	27.8305	36.9281	26.3713	27.2957	28.3417	30.0022	30.5974	31.5642	25.6477	31.0363	28.5392	27.7944	25.413	29.0408	34.8748	24.907	36.4799	29.2478	33.5923	27.1638	30.2949
HPwt4	E02	NA	HPwt	28.4144	29.3114	25.276	27.7037	27.8622	29.5336	25.8636	26.4912	28.5049	29.3065	28.7266	28.187	27.44	24.6812	34.0373	32.7322	27.7565	26.0268	32.9284	26.9571	35.5595	29.8554	32.76	30.2909	33.9414	27.3823	37.0386	26.8055	26.9544	28.5394	30.4951	30.4633	31.5054	26.1254	31.4231	28.3007	28.1078	25.9318	28.8356	34.6163	25.7295	36.4568	28.7713	33.5846	26.5705	30.393
HPwt5	E01	NA	HPwt	28.9988	28.6365	26.5621	25.9648	27.0687	29.2894	25.8597	26.6667	28.7859	29.0687	28.5683	27.9862	26.3568	26.9387	34.1208	33.0109	26.6883	25.0438	33.3812	26.5408	35.912	29.7006	32.6302	30.0557	33.4226	27.4704	37.5657	25.9302	27.3766	28.2044	29.9377	30.6689	32.0143	25.8786	31.7453	28.5084	27.4371	25.2311	28.4802	35.0611	25.8274	36.7793	29.4982	33.2473	27.9348	30.7724
HPwt5	E02	NA	HPwt	28.7406	28.89	26.2013	25.8761	27.511	29.2655	25.8919	26.7827	28.2598	29.0896	29.0504	28.0433	25.9738	25.5424	33.8256	33.116	26.939	25.9489	33.1771	27.1713	35.8587	29.5388	32.6553	30.0269	33.2902	27.8571	37.6489	26.9012	27.1477	28.688	30.4612	30.363	32.222	26.4314	32.122	28.2813	28.0088	25.7764	28.7056	34.8451	26.3286	36.7995	29.2426	33.382	27.7192	30.7592
HPwt6	E01	NA	HPwt	29.4448	29.4191	25.9525	25.267	28.2942	30.2503	25.8094	27.0265	29.5672	29.291	30.1295	28.6801	28.306	27.3268	34.9132	33.4783	26.9505	26.5432	33.2117	27.8129	35.8433	30.1759	31.8326	30.4467	33.8798	30.2099	37.758	26.9684	27.0065	28.7933	29.807	30.4683	32.4107	26.0054	31.9097	28.8997	28.2371	26.2663	28.5558	35.0707	26.2196	37.1299	29.262	33.3448	28.5703	31.4043
HPwt6	E02	NA	HPwt	28.9164	29.2263	26.0545	25.1519	28.0792	29.8672	25.7566	27.4256	29.0361	29.0317	29.7843	28.2476	27.9282	25.4671	34.4493	33.1852	26.9845	26.2259	33.0956	27.5064	35.6562	29.845	31.7139	30.1444	33.6644	27.6921	37.4717	26.3731	26.7462	28.8306	30.2037	30.291	32.2348	26.1209	31.742	28.2862	28.6055	26.507	28.6761	34.7929	26.0726	36.7543	29.0406	33.1863	28.0584	30.9758
HPwt7	E01	NA	HPwt	28.3614	30.6495	26.1855	26.913	27.9637	29.6256	25.4252	26.7802	29.9534	29.1093	23.7892	28.3521	27.2993	25.1577	33.5899	33.4805	26.3521	26.9315	33.4874	28.9789	35.9978	29.9271	31.4019	29.7823	33.5325	27.3688	37.334	26.3021	26.9812	27.9196	30.2092	31.2945	32.5037	25.825	32.268	28.457	27.2865	25.2297	28.1429	35.2436	25.4527	37.0132	28.6952	32.9934	28.2897	30.857
HPwt7	E02	NA	HPwt	28.0133	30.0915	25.3297	26.713	27.4044	29.27	25.0149	26.0594	29.4899	28.6077	26.8443	27.6237	26.8813	24.0585	33.0743	32.9519	26.5999	26.3176	32.9161	28.3272	35.4437	29.6245	30.7968	29.8179	33.0642	27.5927	36.9812	25.2545	26.1598	27.4037	29.8301	30.8541	32.0102	25.6873	31.7209	27.8738	27.326	24.9412	27.6302	34.7325	25.2682	36.6711	28.3099	32.5886	27.6624	30.2923
HPwt8	E01	NA	HPwt	28.6824	29.7282	26.0297	29.839	27.7801	29.8467	25.3046	26.8233	29.1569	29.4239	27.8158	28.0178	27.477	24.76	34.4598	33.0659	26.6903	27.0128	33.0521	27.7379	35.9497	29.8816	31.3068	30.0762	34.1171	27.8056	37.1979	26.1247	27.0317	28.7489	30.5391	30.8896	32.407	25.9673	32.3175	28.1469	27.6741	25.2621	28.9456	34.9108	26.3642	37.0436	28.9954	32.9495	28.2041	31.0359
HPwt8	E02	NA	HPwt	28.4304	29.6164	25.6184	29.6164	27.9764	29.7395	25.1292	26.5928	28.9936	29.0458	27.8683	27.6868	27.0285	24.1878	33.8499	32.8255	26.7438	26.8216	32.67	27.3829	35.7037	29.6663	29.9869	29.9383	33.8226	27.9105	36.9391	25.7636	26.618	28.1311	30.3004	30.6202	32.301	25.827	32.1505	27.9498	27.6255	24.771	28.125	34.6954	26.1437	36.7948	28.4859	32.6178	28.3223	30.6574
HPwt9	E01	NA	HPwt	28.2512	29.356	26.0797	28.0225	27.2673	29.2863	25.507	26.9117	30.1363	28.6757	28.184	26.5577	27.3434	25.942	33.202	33.1601	27.4108	26.1193	32.9375	28.1886	35.7585	29.3933	31.086	30.0537	33.5173	27.7445	37.2028	26.533	27.1179	27.5484	30.7089	30.6498	32.0885	25.0866	31.7951	27.5803	27.8838	25.2898	27.8683	34.7266	25.074	36.7127	28.7128	32.087	28.4446	30.3824
HPwt9	E02	NA	HPwt	27.6569	29.2911	25.1923	27.6712	27.3657	29.1835	24.907	26.3601	29.7174	28.6293	27.8141	27.1486	27.1715	25.1733	32.5037	32.7778	26.1219	25.9214	32.6618	27.3461	35.3586	28.9109	30.6869	29.9188	33.3773	28.043	36.8744	25.4698	26.1582	27.2001	29.9638	30.4748	31.8674	25.3858	31.6246	27.548	27.1957	24.7754	26.7788	34.3769	24.1933	36.4412	28.1639	31.6451	27.7633	30.0586
HPwt10	E01	NA	HPwt	28.5898	29.4129	25.5795	27.8921	27.6134	29.1086	25.59	26.8557	28.8649	29.0112	29.1563	28.4063	27.6016	25.9523	34.1237	33.0317	27.3448	26.0357	33.0166	28.2604	35.4011	30.1959	33.0944	30.3346	33.3371	27.6528	37.8177	25.7466	27.3195	28.7381	29.2578	30.5692	32.1561	25.6675	31.9496	28.2645	28.393	24.2109	28.6916	34.9413	26.1523	36.5286	28.9118	32.77	29.0141	30.6535
HPwt10	E02	NA	HPwt	28.2513	29.0389	25.3365	27.1323	27.0697	28.8026	25.1965	26.0991	28.251	28.6052	28.337	27.9292	26.5163	25.0109	33.5152	32.4603	26.1457	25.8887	32.4286	27.42	34.8496	29.6622	32.4893	29.8075	32.7924	26.7254	37.2972	25.8312	26.494	27.7873	29.6016	30.1787	31.4433	24.9893	31.3633	27.9687	27.6181	25.2227	28.5072	34.3644	25.6078	36.134	28.1515	32.4729	27.7852	30.1769
HPvar1	E01	BRCA2	HPvar	29.2224	28.6805	26.6909	28.8538	27.9505	29.6985	25.7004	27.0619	31.1799	28.9909	26.3817	26.9753	26.1609	27.3395	34.4876	33.676	25.9147	26.784	33.0756	26.1395	35.4412	29.7045	31.0306	30.4778	32.0646	27.6709	38.141	25.4685	26.0766	28.1886	30.0815	31.1485	32.0192	26.0053	31.9493	28.5701	25.3464	24.7791	27.6306	35.169	26.3569	37.2151	28.9237	33.2097	27.2029	30.4311
HPvar1	E02	BRCA2	HPvar	29.0121	29.4799	26.7926	28.8322	28.1236	29.2875	25.7301	27.2303	30.8365	28.7548	27.0104	27.85	26.2188	26.6277	33.6685	33.644	26.9605	26.5658	33.0923	27.4698	35.2787	29.6492	31.5541	30.5669	31.8786	27.8409	38.25	24.2028	26.4261	28.1936	30.0584	31.2714	32.3289	26.5944	32.2594	27.7645	27.9225	23.8266	27.4046	35.0711	26.3574	36.7462	28.7196	33.2611	27.3053	30.5036
HPvar2	E01	BRCA1	HPvar	29.2151	28.8332	26.1993	28.2364	28.2178	29.9501	24.8579	26.9102	30.2353	29.3582	27.5992	27.1439	26.1902	28.1588	33.4282	33.1103	26.585	26.7496	33.2444	26.9108	35.6422	29.7349	31.2448	30.534	32.8195	27.5097	37.6111	26.2838	27.1349	28.2111	30.3331	31.0744	31.977	25.4317	31.9162	28.0107	25.779	22.4597	28.8577	34.711	26.0553	37.1374	28.1159	32.9129	26.9355	30.5189
HPvar2	E02	BRCA1	HPvar	28.6361	29.941	25.5827	28.4299	27.8973	29.6481	25.5886	26.578	29.5924	29.1893	27.4447	27.4721	26.5323	26.1358	32.765	33.0566	27.0679	26.7697	33.1594	27.7349	35.3664	29.6851	31.4625	30.8967	32.457	27.5789	37.631	25.328	27.099	28.2674	30.1765	31.2758	32.1305	25.8488	31.8761	27.8629	27.5524	22.2686	28.1232	34.6825	26.1995	36.757	29.0639	32.8429	26.8597	30.4498
HPvar3	E01	BRCA1	HPvar	29.1742	28.9418	25.8615	27.0264	27.8998	29.6837	25.7065	26.7376	31.4948	28.9914	26.2969	27.9803	26.4995	27.6306	33.2955	33.1254	25.6061	26.2876	32.9892	27.3219	35.1154	29.35	31.5236	30.0317	31.6878	27.827	37.7942	25.4068	26.7552	27.7931	30.2446	31.0319	31.787	25.8036	31.8737	27.8267	26.8902	23.8968	28.1194	34.9883	25.9719	37.3082	28.3526	33.0117	27.2432	30.3052
HPvar3	E02	BRCA1	HPvar	28.7035	29.708	27.4611	27.214	27.7541	29.8192	25.9347	27.2827	31.3605	28.9633	26.8606	28.1097	27.0573	27.1427	32.8662	33.2083	26.3195	26.6812	32.6445	27.7746	35.1207	29.1387	31.368	30.1869	31.1594	28.9133	37.8384	25.8102	25.8608	28.1095	30.1954	31.052	32.0268	26.1973	31.9853	27.6642	28.1666	25.2649	28.297	34.9013	25.8878	37.1659	27.4532	33.0349	27.0852	30.4474
HPvar4	E01	BRCA1	HPvar	28.7587	28.7087	26.1257	26.5801	27.0497	29.6713	26.2431	25.9659	29.8886	28.9007	26.2365	27.7036	25.4573	27.3113	34.8828	33.1968	26.5593	25.8323	32.9982	26.369	35.9667	29.7943	32.2115	29.8248	31.8429	28.6475	37.8219	27.2015	26.966	28.0405	29.718	30.7181	31.438	24.2072	31.2347	28.5793	27.5754	23.6784	29.0501	34.6975	25.2272	36.9958	28.601	33.3689	27.5668	30.3805
HPvar4	E02	BRCA1	HPvar	28.3628	28.9132	25.1743	25.7169	27.0898	29.2065	26.2366	24.5996	29.3547	28.7746	26.2867	27.1784	25.3007	24.8751	34.3613	33.0057	25.5731	25.5117	32.4338	26.5579	35.4911	29.2565	31.1833	29.3538	31.2858	27.7407	37.6808	27.7764	26.5385	27.5669	29.1144	30.2029	30.9981	24.6617	30.8955	28.2963	27.9387	24.6823	28.8431	34.2744	25.4064	36.6815	28.5124	33.0422	26.9689	30.0166
HPvar5	E01	BRCA1	HPvar	28.7015	28.6317	26.0083	25.6712	27.4856	29.8362	25.6195	26.3904	30.6769	28.9787	27.7795	27.9974	26.2894	27.277	34.847	33.0001	25.4416	26.4084	32.8683	25.2221	34.8934	29.4864	30.7832	29.7344	32.1432	26.8788	37.3393	27.3013	26.9606	28.534	30.1676	30.6455	31.7413	25.3734	31.4917	28.4848	27.5755	23.8201	28.095	34.7308	25.8085	37.1492	28.318	33.2721	26.8017	30.4069
HPvar5	E02	BRCA1	HPvar	28.6723	29.8257	25.265	25.7888	28.1202	30.1889	25.7085	27.0425	30.7009	29.293	27.4894	28.2153	27.1874	26.3547	33.7934	33.0383	26.5219	26.5826	32.9051	25.7925	34.7652	29.3807	30.8402	29.9226	31.768	27.6301	37.4384	27.4583	26.3472	27.7828	30.2193	30.7757	32.0696	26.3774	32.0379	28.1319	27.9618	24.8595	28.0426	34.6866	25.6027	37.0627	28.4481	33.1662	27.303	30.399
HPvar6	E01	BRCA2	HPvar	28.8422	29.0766	25.3898	29.7592	27.8137	29.7737	25.8726	25.3076	30.7945	29.1504	27.1402	27.9179	26.0629	27.1295	34.1249	33.1701	25.1155	26.2509	32.8047	26.2166	35.0353	28.9792	30.9322	29.4796	32.3169	26.6502	38.2158	26.0705	26.9889	28.0922	30.4218	31.2353	31.8176	24.6415	31.7245	27.6701	27.1377	23.1057	28.0392	34.8446	22.9767	37.4051	27.9057	33.1386	26.7494	30.4785
HPvar6	E02	BRCA2	HPvar	28.787	29.8262	25.5036	29.4537	27.8344	29.7156	25.4743	25.8118	30.8602	29.013	27.1454	27.8418	25.986	26.4615	33.427	33.1191	25.618	26.5695	32.657	25.9044	34.9838	28.8369	30.897	29.5942	31.6556	27.2204	38.1706	27.4237	26.6798	27.9835	30.2897	31.0365	31.5717	25.2347	31.8221	27.3626	28.1461	24.1581	28.069	34.722	24.9942	37.2324	27.8412	33.039	26.807	30.4632
HPvar7	E01	BRCA2	HPvar	29.2193	28.9628	25.5585	28.6101	27.7322	29.3368	25.4946	25.9509	30.2145	28.8502	26.8858	27.3796	26.3646	26.4461	33.4869	32.6873	25.5164	26.204	32.9056	26.4982	35.5408	29.3186	31.006	29.3015	31.6666	26.8098	37.6287	25.7023	26.9828	27.5896	29.9381	30.8032	31.7137	25.4465	31.4731	28.4208	27.2969	23.8057	27.9721	34.7581	25.4297	37.1407	28.1979	32.9406	27.5235	30.5089
HPvar7	E02	BRCA2	HPvar	28.2276	29.6046	25.2658	28.4942	27.3949	29.0784	25.0111	25.9741	29.263	28.5709	26.3091	26.2522	24.9565	25.4539	31.9984	32.3537	25.261	26.1685	32.5417	27.0902	34.9997	28.4287	30.5924	29.2054	31.0972	27.0079	37.3315	24.01	25.4885	27.101	29.8538	30.811	31.5791	25.5923	31.6148	27.7251	27.675	23.1961	26.801	34.3792	24.9058	36.3053	28.0912	32.6598	27.1606	30.0803
HPvar8	E01	BRCA1	HPvar	29.1998	29.2873	25.6456	28.1665	28.5867	29.6665	25.2299	27.1014	29.2237	29.0933	27.923	27.6498	26.2899	27.1075	33.7482	33.1676	26.594	25.9632	32.7778	27.2467	35.5683	29.479	31.8507	30.078	32.2649	28.9347	37.8283	26.4863	26.018	28.5071	30.0822	30.425	32.1714	25.9212	32.1129	28.2816	25.3666	24.9711	28.3505	34.9515	25.5803	37.0671	28.9566	33.0766	27.981	30.3568
HPvar8	E02	BRCA1	HPvar	28.7061	29.01	25.0161	27.9743	27.7717	29.1978	24.6934	26.5093	28.6908	28.6016	27.1412	26.5666	26.3233	25.2496	33.1062	32.6944	26.7351	25.4721	32.1741	26.9506	35.0922	29.047	30.6518	29.7805	31.7788	26.9879	37.4859	26.7324	26.5753	28.2912	29.2159	30.0929	31.7241	25.7865	31.6647	27.6208	27.8242	24.1484	28.2677	34.445	24.2187	36.6432	28.5214	32.6389	27.4646	30.0329
HPvar9	E01	BRCA2	HPvar	29.0345	29.7847	25.8364	27.6391	28.5171	30.2327	25.6861	26.5754	30.2768	29.3552	27.3974	28.3847	23.7307	26.1367	33.9591	33.1076	26.488	25.7513	33.1633	27.498	35.8008	30.0643	30.8867	30.4033	32.6605	27.5567	37.8639	25.0921	27.128	27.9959	29.7139	31.4277	31.4886	26.0816	31.545	28.0725	26.8558	23.8273	28.7532	34.7465	26.5077	37.1485	28.279	33.1578	27.4981	30.4012
HPvar9	E02	BRCA2	HPvar	28.2023	29.4968	25.2411	27.3628	28.0254	29.8556	25.152	25.9064	29.6151	28.6286	26.6283	27.5723	25.718	25.4079	33.1316	32.6562	26.646	25.709	32.5015	27.0726	35.2274	29.737	30.384	30.0571	32.043	27.397	37.486	24.8773	26.1989	27.5211	29.1705	30.9276	31.1664	25.703	31.0059	27.8811	27.3377	24.5299	28.4649	34.1646	25.8836	36.5673	28.3245	32.6702	26.8763	29.8609
HPvar10	E01	BRCA2	HPvar	29.5612	30.2064	25.6997	30.8785	28.1655	29.7342	25.4233	26.6957	30.7707	28.5933	27.0991	27.5706	27.3004	26.475	32.6221	33.0639	27.0258	26.6857	33.03	27.7685	35.8415	29.2017	30.8294	30.2353	31.9236	27.68	37.7702	25.9777	26.3264	28.4939	30.0297	30.9068	31.8712	26.0506	31.5354	27.5989	27.9651	25.2591	27.7938	34.9524	25.9147	36.822	28.0005	32.9669	27.4423	30.0286
HPvar10	E02	BRCA2	HPvar	29.3531	29.6938	25.3876	30.312	27.7993	29.4943	25.0268	26.3251	30.1121	28.2806	26.1159	27.3131	25.317	25.3181	32.1457	32.7434	26.8111	26.3109	32.6241	26.1258	35.5296	29.0528	31.0436	29.7039	31.6532	27.1741	37.1103	25.0393	25.8141	27.3915	29.8754	30.4455	31.4489	25.4126	31.2326	27.8907	26.5006	24.877	27.2912	34.3058	24.5091	36.1467	27.4304	32.5443	26.842	29.6983
OCwt1	E01	NA	OCwt	29.5823	29.3958	25.6907	31.8131	28.5998	30.1519	25.91	25.1185	29.1036	29.0661	28.5162	27.4893	27.9393	27.4142	34.1289	32.6478	27.5298	25.8502	33.0901	26.6601	35.5054	28.6325	33.3143	29.665	33.5101	26.9669	36.5099	28.1057	27.8386	28.125	29.6092	31.1403	31.6858	24.9417	31.2365	28.8616	26.3153	26.6339	27.9272	35.1275	25.8627	36.4062	28.7193	33.8705	27.7622	30.3413
OCwt1	E02	NA	OCwt	29.7066	29.8828	25.5387	32.0534	28.7133	30.0848	26.0444	26.3873	28.934	29.0819	29.3393	28.1283	28.3601	25.5422	33.8043	32.8114	27.0226	26.8725	33.0124	26.7661	35.5356	29.294	33.4285	29.7247	33.6573	27.4646	36.7801	28.3681	27.3923	29.0982	29.8748	31.1696	31.8165	25.8112	31.5868	28.8765	27.2407	27.0237	28.3983	34.8896	26.628	36.6503	29.1701	34.0846	27.7822	30.8035
OCwt2	E01	NA	OCwt	30.2229	29.7833	27.2522	32.5346	28.4078	29.8192	26.431	22.2532	28.5335	28.8581	29.0901	27.7077	28.4776	26.9468	33.3525	32.6239	27.0657	26.837	33.1256	27.2283	36.2235	28.1418	29.3154	29.9026	34.3961	28.0257	36.8489	26.8065	27.0699	28.1724	29.4285	31.6885	31.7674	25.7722	31.2048	28.9466	26.0607	26.1711	26.5451	34.633	24.5803	36.9257	28.3914	33.2775	27.7569	30.681
OCwt2	E02	NA	OCwt	30.156	30.3223	27.1342	32.6649	28.914	29.8392	25.8252	25.4909	28.3492	29.2224	29.1718	27.8308	28.1693	25.4628	32.7736	32.8109	27.5269	26.9783	32.9822	28.6772	35.9446	28.4361	29.7502	30.1333	34.2894	27.6775	36.8353	27.284	26.9446	28.3557	29.4231	31.6942	32.1971	26.2913	31.5402	28.9701	27.3897	26.0256	27.1575	34.6041	25.8864	36.94	28.1971	33.2973	27.3278	30.8714
OCwt3	E01	NA	OCwt	29.1913	29.2088	24.8981	33.9239	29.1086	30.3951	26.0942	24.4427	27.8351	28.0922	29.1395	27.6252	28.5855	26.4555	32.0668	32.1329	27.4554	25.5211	32.084	27.5598	35.0184	27.78	28.7555	29.6573	33.1894	26.4045	35.8488	27.8705	26.2168	27.4592	29.1162	31.1302	31.246	24.6154	30.9573	28.8259	26.6713	24.9449	25.1575	34.5593	26.2954	35.899	27.5743	32.5412	27.0549	30.0702
OCwt3	E02	NA	OCwt	29.3187	29.84	24.6726	34.1073	29.1953	30.2569	26.3573	24.8925	27.3442	28.4507	29.6768	27.402	28.2132	24.5393	31.4512	32.2133	27.2978	26.1248	32.038	26.6125	34.9224	28.3306	29.711	29.6009	33.0531	26.2299	35.8116	26.859	26.1124	27.1732	28.7373	31.0655	31.0564	25.1283	31.2384	28.6759	27.3845	25.2688	25.6289	34.3612	26.8025	35.6869	27.5528	32.655	26.5716	30.1829
OCwt4	E01	NA	OCwt	30.3872	29.7101	26.3549	32.132	28.0057	29.4849	26.3031	26.0541	28.046	29.2452	29.0304	27.9267	28.1245	26.1065	34.3444	32.4864	27.5013	26.0549	32.6084	26.6994	35.6806	28.7535	33.0862	29.8875	33.4776	28.1847	36.0515	26.2696	26.9592	28.0222	29.5959	31.5892	31.6982	23.6332	31.214	28.2352	27.2201	26.0354	27.2214	34.5743	25.8184	36.4823	28.4175	32.9269	27.1599	30.545
OCwt4	E02	NA	OCwt	30.2778	29.911	26.3338	32.1134	28.1117	29.2999	25.8835	26.8598	27.5902	29.2394	29.6375	28.1174	27.6829	25.3158	34.1488	32.5674	27.0881	26.6531	32.4195	26.6142	35.75	29.2238	32.995	29.7066	33.3779	27.7976	36.0019	26.7471	27.0855	28.3085	29.5664	31.3562	31.8881	23.8889	31.3261	27.7866	27.7511	26.1499	26.6231	34.3737	25.9805	36.3919	28.6965	32.8428	26.5482	30.6152
OCwt5	E01	NA	OCwt	30.7974	30.2135	26.8007	34.2634	28.7276	29.5473	25.8861	24.5481	28.1222	28.7506	28.9523	27.4851	28.5597	25.0599	33.64	31.5799	26.2383	26.0503	32.4879	28.0434	34.7706	28.4315	32.8737	28.9803	33.8777	27.4289	35.6716	25.409	27.7037	28.3235	29.3947	31.9821	30.8916	24.8943	30.4496	28.7714	26.4211	26.3886	27.2536	33.9969	22.1167	36.5207	28.1286	32.8291	26.9591	30.2518
OCwt5	E02	NA	OCwt	30.7823	30.771	26.9391	34.5629	28.829	29.5986	26.0241	25.577	28.0422	28.8002	29.0011	27.6301	28.4452	24.7102	33.2347	31.6901	26.7042	26.6388	32.4927	27.9474	34.8167	28.963	31.9882	28.5209	33.8854	27.3432	35.7905	26.8038	27.6917	28.3718	29.5001	31.9343	31.6304	25.6219	30.7418	28.7219	26.3795	26.4546	27.3194	34.0216	24.7696	36.6123	28.2847	32.7746	26.717	30.7452
OCwt6	E01	NA	OCwt	29.5918	29.5631	26.1088	31.7432	29.2948	29.9106	27.401	25.1963	28.1674	28.1756	29.2439	26.6747	28.5194	27.6599	33.7776	32.3613	27.1181	24.2542	32.7875	28.6187	35.1059	29.0052	32.4135	29.5654	33.0757	27.3344	35.9192	27.3078	28.8274	27.4166	29.404	30.7598	31.6412	24.7843	30.8703	28.4822	27.5579	23.9287	27.6814	34.7444	25.2858	36.4415	28.8724	32.6122	26.882	30.8642
OCwt6	E02	NA	OCwt	28.9619	29.0417	26.0327	30.6064	28.7693	29.4595	26.7923	24.5478	27.6083	27.4121	28.857	26.2718	27.7967	26.7179	33.1778	31.697	26.8702	24.5955	31.903	27.42	34.2964	28.1685	31.6069	29.2021	32.5	26.4385	35.5121	26.8432	27.0687	26.5805	28.7999	30.2279	30.6677	24.6967	30.3353	27.7234	27.2943	24.841	27.1562	34.2213	24.8538	35.8849	27.855	31.9352	26.07	30.1243
OCwt7	E01	NA	OCwt	29.5574	29.8665	26.2428	32.2466	28.3837	30.0176	25.4677	26.8261	28.4787	29.4838	29.2491	27.778	28.5889	24.9294	34.758	32.894	27.138	26.8448	33.0148	28.2525	35.6221	29.9111	31.1797	30.1237	33.6925	27.902	36.9144	27.1498	27.6479	29.2854	30.5336	31.4282	32.2476	26.4489	32.1309	28.5089	28.1741	25.2336	29.1078	34.9224	26.4908	37.1197	28.2666	33.6601	26.6699	31.1671
OCwt7	E02	NA	OCwt	29.0682	29.284	25.6794	32.0291	28.2985	29.7083	25.4566	26.079	27.9919	29.0622	28.6596	27.4422	27.8206	24.2445	34.1371	32.4953	27.4131	26.2452	32.3481	26.9604	35.2291	29.5542	30.6645	30.0341	33.3527	27.6615	36.5729	26.4803	27.0986	28.1359	29.716	31.0753	31.7207	26.1665	31.6071	28.3082	26.9455	24.9352	28.9035	34.4578	26.1068	36.9658	28.1037	33.2977	26.8275	30.4826
OCwt8	E01	NA	OCwt	29.6245	29.8719	27.3899	35.8093	29.7673	30.8423	24.2872	24.9624	28.5051	29.3613	30.5452	28.9777	29.3534	25.8356	33.1217	31.0517	29.3813	26.336	32.3307	28.036	35.4167	28.5314	30.1748	30.9831	34.9923	27.2138	35.3604	27.7278	26.9142	28.054	28.9515	31.2279	30.6588	26.0612	30.8961	29.1178	25.4326	26.0879	26.8924	34.0177	25.016	37.0671	28.4527	32.5155	25.3609	30.7425
OCwt8	E02	NA	OCwt	29.0369	29.7039	27.7108	35.6734	29.369	30.6283	24.183	24.547	28.3844	28.8276	30.3017	28.299	28.859	24.2568	32.2687	30.7464	29.1488	25.6708	31.7135	27.8255	35.1217	28.2166	29.2832	30.7098	34.5939	27.2438	34.9212	27.8764	26.6842	27.7086	28.3667	30.9432	30.4262	25.8126	30.4863	28.5863	26.5932	23.8558	27.3894	33.5946	25.4238	36.7332	28.0754	32.0074	25.1045	30.2118
OCwt9	E01	NA	OCwt	29.9375	30.3083	26.5279	35.4988	27.9189	30.0837	25.7181	24.2059	27.8627	28.6663	27.6581	27.7491	26.5292	25.3698	32.7151	32.8305	28.1859	26.4291	32.2424	28.5545	35.9457	28.0521	30.4725	29.9428	33.3712	26.7314	37.0902	26.134	26.978	28.0397	29.1962	30.8942	31.306	25.8641	31.0391	28.066	27.8035	24.5858	26.8426	34.2574	25.7895	36.8122	28.5213	32.2027	26.2312	30.0436
OCwt9	E02	NA	OCwt	29.5831	30.1237	26.427	35.3763	28.0022	30.0291	24.8958	23.9498	27.7184	28.5276	25.8515	27.7621	25.4114	24.5299	31.7249	32.3972	27.7191	26.1961	32.115	27.166	35.4632	27.9205	30.1579	29.6037	33.1137	26.751	36.8132	24.591	25.7758	27.455	29.065	30.7958	30.738	25.5844	30.8746	28.274	26.2838	24.9067	26.5833	33.9154	25.3413	36.6694	27.5541	31.7509	25.9725	29.6023
OCwt10	E01	NA	OCwt	29.2543	29.9944	26.6245	32.4016	28.5352	30.4927	26.0188	27.2804	29.1307	29.3025	28.229	27.9386	27.7941	25.7932	33.5502	33.1897	27.5079	26.3288	32.6401	28.4625	35.4684	29.2769	30.83	29.9967	33.1456	28.168	38.2796	29.7197	27.5241	28.5153	29.7514	31.1545	32.123	26.3653	31.3911	28.5208	28.2891	23.7856	28.4828	35.2655	26.9862	37.7289	28.5161	33.4675	27.378	30.7195
OCwt10	E02	NA	OCwt	29.1156	29.4787	26.1254	31.8237	28.2263	30.0301	25.636	26.6111	28.5946	28.8363	27.4301	27.5778	27.3786	25.3641	33.0079	32.6769	26.9506	26.049	32.2609	27.1508	35.0685	28.7514	30.0626	29.6257	32.7474	27.7086	37.7679	29.2081	26.5534	28.2905	29.1538	30.8123	31.1728	26.0435	30.9176	28.0158	27.1975	23.9025	27.4976	34.4682	25.9478	37.405	27.8658	33.1844	26.2747	30.2371
OCvar1	E01	BRCA1	OCvar	29.95	29.4799	26.7899	34.7882	28.5554	30.1798	25.8285	21.7522	27.8585	28.9062	29.0387	27.6329	28.5122	27.2624	33.4738	32.1722	27.5474	26.3196	32.8026	28.6068	35.8812	28.8806	32.5064	29.6267	33.9555	27.2672	35.9655	27.392	27.8162	27.9109	29.0935	31.1009	31.0448	24.9719	30.9431	28.3528	26.1361	25.9428	27.4023	34.2969	24.747	36.377	28.0267	32.8048	26.9013	30.015
OCvar1	E02	BRCA1	OCvar	29.87	30.1776	26.4795	34.8426	28.7831	30.0406	26.9088	24.1943	28.0792	28.758	29.565	27.5976	28.4648	24.8952	33.3422	32.276	27.507	26.4343	32.4389	28.4236	35.743	29.219	32.2203	29.8198	33.9448	27.3851	36.0382	27.2585	27.4162	28.9128	30.1541	30.9742	31.2222	26.0963	30.9456	28.4599	27.7796	25.842	27.4122	34.1235	25.3877	36.3047	28.5412	32.5417	27.1858	30.5253
OCvar2	E01	BRCA2	OCvar	30.0298	29.3151	25.8009	35.5042	28.2247	30.0202	26.4355	24.0412	27.2297	28.1734	28.9165	27.556	28.1073	26.2374	32.9365	31.1345	27.3549	25.8047	32.359	29.6199	34.8782	27.487	31.846	29.1192	33.8837	26.7085	36.1064	27.8019	27.4374	28.56	28.8248	31.4325	30.7561	24.7368	30.4326	28.7999	26.0548	24.7797	27.3616	33.837	23.5343	36.1335	27.7283	32.6505	26.8613	29.8009
OCvar2	E02	BRCA2	OCvar	30.1932	30.4961	26.8236	35.8451	28.8187	30.3537	26.2805	23.7496	27.8885	28.7909	28.7192	27.6863	27.2479	25.3599	32.6955	31.4882	27.235	26.9137	32.7427	28.1887	35.1643	28.3975	29.5359	29.4291	33.9903	27.6097	36.3659	28.8247	27.0327	28.9035	29.2303	31.2934	30.91	25.9341	30.9851	29.1154	26.0117	25.2452	27.5629	34.003	25.1392	36.4167	28.3821	32.5166	26.8937	30.6
OCvar3	E01	BRCA2	OCvar	30.1318	30.1089	26.9119	36.1888	28.4978	30.0987	26.0196	21.7319	27.8608	28.7101	28.7667	27.2987	28.33	26.347	34.5275	31.6436	27.8003	26.5056	32.8283	28.8014	36.1237	28.6032	30.4931	29.7895	34.0603	26.8619	36.4766	28.8519	27.3232	28.9228	29.3627	31.6936	31.5008	25.6149	30.5493	28.9461	25.0528	25.5655	27.1286	33.8342	25.2596	36.0161	28.249	32.3494	26.7913	29.7332
OCvar3	E02	BRCA2	OCvar	30.1851	30.9627	27.0482	36.1685	28.7751	30.0062	25.9302	23.7718	27.4046	29.1713	28.8424	27.5921	27.6253	24.7365	34.2086	31.9885	27.8418	27.1866	32.7946	28.3573	35.9091	28.8919	30.5825	29.7711	33.9438	27.9677	36.6214	29.3012	27.1881	29.3151	29.1567	31.5368	31.2824	26.1009	30.9341	28.902	26.2512	25.6602	27.786	33.7784	26.3443	36.3323	28.4642	32.3151	26.9169	30.3117
OCvar4	E01	BRCA2	OCvar	29.7214	29.8324	26.473	34.1254	28.4774	30.9696	26.0373	22.2156	26.6658	28.5449	28.3714	26.3935	28.037	26.1166	33.6776	31.4335	27.1587	25.9733	32.4193	28.372	34.9003	27.5055	29.3325	29.4441	33.6341	27.0809	35.4567	29.7052	26.6553	28.3838	28.4729	31.551	30.6952	25.7929	29.8647	28.4947	25.2394	25.0248	26.8511	33.8681	24.4564	36.1255	27.561	31.9512	25.4786	29.9432
OCvar4	E02	BRCA2	OCvar	29.6525	31.0379	26.5714	34.4524	29.4552	31.0032	25.5968	24.1989	27.1727	28.6522	27.1575	27.0753	27.1045	24.6529	32.2907	31.478	27.8522	26.9483	32.6963	27.7759	34.9203	27.0385	29.6795	29.5066	33.4868	27.4427	35.6825	28.4173	26.8143	28.3434	28.6416	31.4702	31.3841	25.865	30.5487	27.7505	25.5017	24.9233	27.1167	33.958	25.5429	36.2296	28.3071	31.7886	25.9744	29.8461
OCvar5	E01	BRCA2	OCvar	29.4085	29.8841	26.8309	31.9041	30.5404	31.9654	26.0299	27.178	27.376	29.1288	31.4412	26.6367	29.3521	25.7789	32.3815	31.333	26.8617	26.1965	32.9927	26.482	35.5582	27.8093	26.6626	29.3095	33.5807	27.4223	35.37	30.2493	27.5342	27.6797	30.1768	30.689	31.9776	26.7545	31.3548	28.8213	25.8212	24.6794	25.8968	33.7432	25.857	36.6829	27.5329	32.772	25.3805	29.4316
OCvar5	E02	BRCA2	OCvar	29.0098	29.5835	26.3072	31.3237	30.1866	31.9522	25.3423	26.9772	26.8165	28.7916	31.0555	26.6179	29.4063	26.7218	32.0135	31.1033	26.3038	24.9543	32.6352	26.6774	35.6694	27.9395	26.3307	29.3134	33.3587	27.0505	35.1238	30.1003	27.1024	27.4433	29.6655	30.1269	31.7677	26.3533	31.1468	28.0055	25.6393	24.8317	26.1358	33.1871	25.8292	36.4966	27.7593	32.5201	25.1513	29.5677
OCvar6	E01	BRCA2	OCvar	28.8315	29.7562	26.3786	30.024	28.6826	30.7163	25.8245	26.4902	28.006	29.2185	29.76	27.6119	28.42	27.5676	34.4893	32.3003	27.1801	25.8146	32.7869	27.7032	35.4646	29.5109	32.2376	30.072	33.4344	28.8673	36.6478	30.4587	27.5206	28.8213	29.6458	30.9898	31.5788	25.3564	31.7767	28.2501	27.2237	25.324	28.0205	34.474	25.1271	36.6846	28.2764	33.2038	26.9337	30.5834
OCvar6	E02	BRCA2	OCvar	28.4617	29.7523	25.8405	29.9124	28.4766	30.4822	25.7917	25.7102	27.6329	28.8892	29.5462	27.3859	28.2344	25.4117	34.1014	32.0409	27.2058	26.1557	32.439	26.6972	35.3112	29.1563	32.8627	30.1864	33.1775	27.5504	36.4693	30.316	27.287	28.414	29.7402	30.8175	30.8362	25.693	31.5889	27.6315	27.2374	25.0156	27.9927	34.2426	24.8942	36.4764	28.3923	33.0801	26.2316	30.4248
OCvar7	E01	BRCA1	OCvar	29.5824	30.0772	26.5538	28.7773	27.8408	29.7562	25.0862	26.4259	27.8502	29.0459	29.4219	27.2908	27.334	25.3298	33.6346	32.537	26.466	26.5364	33.0248	27.6031	35.9655	28.9795	31.8133	30.1901	34.6902	28.0197	35.9598	28.3359	26.748	28.8399	29.964	30.5465	31.0016	26.2519	31.4932	28.1706	27.3443	26.5411	28.2798	34.4396	25.1981	36.6285	28.0431	33.0687	27.9216	30.2111
OCvar7	E02	BRCA1	OCvar	29.0999	29.7766	26.4195	28.553	27.7998	29.5232	25.2335	25.7422	27.3274	28.7386	29.1935	27.1045	27.5383	24.7034	33.7252	32.2482	26.5176	25.7694	32.566	27.2868	35.6727	28.6675	32.1481	29.9167	34.4615	27.6717	35.8229	27.5717	26.7071	28.5354	29.6966	30.3178	30.9548	25.9277	31.0885	28.0777	26.414	26.1772	27.8494	34.0993	25.0902	36.3427	28.3812	32.9097	27.7164	29.8802
OCvar8	E01	BRCA1	OCvar	29.9275	29.873	27.0044	29.5772	28.1728	30.2822	26.082	26.3534	28.2288	29.4721	29.0041	27.9606	27.9752	25.5374	34.5567	32.7867	27.4453	26.6096	32.9605	26.6305	35.9164	29.7512	33.534	30.4342	33.3191	28.046	36.3924	28.2833	28.3254	28.8571	30.2098	30.9233	31.3608	25.4038	31.9334	28.5911	25.8887	26.3253	28.3126	34.7207	26.0667	36.5593	28.4845	33.4995	28.0693	30.1581
OCvar8	E02	BRCA1	OCvar	29.7078	29.735	26.8445	29.3196	28.0512	30.0925	25.5288	26.1978	27.8081	29.0864	28.559	27.6474	27.4102	23.9825	33.9576	32.827	26.9804	26.1601	32.3574	27.1778	35.649	29.649	31.5888	30.0244	32.9739	28.2295	36.174	28.6578	26.9751	28.7188	29.6803	30.3732	30.9808	25.7372	31.7003	28.0407	26.8576	25.4211	28.3397	34.2705	25.6794	36.3708	28.3475	33.169	27.8118	30.044
OCvar9	E01	BRCA2	OCvar	29.1106	29.3568	26.2846	27.9687	27.7328	29.6066	25.6216	26.4183	28.3716	29.0671	28.7464	28.0117	27.6245	25.5234	35.1041	32.9055	27.8462	26.0869	32.8626	28.1566	35.7368	30.3647	33.0222	30.3359	34.3223	28.2341	37.0393	27.9145	27.417	28.8348	30.8439	30.8639	31.7855	25.776	31.7254	27.8061	28.6237	23.8939	28.3093	34.7802	26.2265	36.494	28.6999	33.0137	27.8715	30.4267
OCvar9	E02	BRCA2	OCvar	28.4893	28.929	25.8278	27.5634	27.4414	29.4273	25.4293	26.0787	27.9925	28.5734	28.045	27.6628	27.0366	24.3952	34.7567	32.4726	27.2274	25.7788	32.5643	26.3899	35.1912	29.989	32.6235	29.9992	33.8804	27.5059	36.7456	27.5146	27.7111	27.6062	29.7623	30.6217	31.1805	25.5396	31.2692	28.0116	27.4449	25.4716	28.6283	34.36	25.7043	36.2448	27.9402	32.8673	26.9226	30.1171
OCvar10	E01	BRCA2	OCvar	30.9071	30.722	27.1729	34.7339	29.5298	31.4814	25.3999	24.3246	28.4255	28.8792	28.416	27.6394	27.7778	24.749	31.9531	32.0051	28.5767	26.7634	32.595	27.7539	35.9756	28.0092	30.5322	30.1068	33.2009	27.642	37.4311	27.6129	27.7144	28.505	29.764	31.5495	31.4923	26.3823	30.8571	28.7428	27.2415	26.2964	27.7485	34.4144	26.127	36.8536	28.8434	32.5165	27.1312	29.6735
OCvar10	E02	BRCA2	OCvar	30.4562	30.26	26.7013	34.5273	29.3279	30.8636	24.5448	24.031	27.5185	28.2673	26.5702	26.4848	26.6254	24.3763	31.6263	31.4424	27.8195	25.9204	32.2236	25.1448	35.1734	28	29.9222	29.5493	32.7296	27.0636	36.8236	26.53	26.426	27.6722	29.0537	30.9925	30.6519	25.8773	30.4592	28.0574	26.2646	25.6641	26.3737	33.8276	25.2692	36.2013	28.2814	31.7023	26.8493	29.3086
HPwt: Healthy subjects without BRCA1/2 carriers
HPvar: Healthy subjects with BRCA1/2 carriers
OCwt: Ovarian cancer patients without BRCA1/2 carriers
OCvar: Ovarian cancer patients with BRCA1/2 carriers
[truncated: 328 more columns]
