# Supplementary material for: Plasma Protein Biomarkers Associated with Higher Ovarian Cancer Risk in BRCA1/2 Carriers
Source: Cancers (Basel). 2021 May 11;13(10):2300. doi: 10.3390/cancers13102300 (PMC8150736; doi:10.3390/cancers13102300)
Supplement: Supplementary file 1 [file cancers-13-02300-s001.zip › Supplementary table S3.xlsx]

## Sheet: Sheet1
Supplementary Table S3. Differentially abundant proteins between the healthy subjects and ovarian cancer patients.
Uniprot Accession ID.	Gene Name	-log10 (adjusted p-value)	Log2 fold_change (OCTotal/HTotal)	Minimal sample size *	Significance? ¶	AUC
P02765	AHSG	17.0758	-0.743718	8	N	0.9725
Q99497	PARK7	16.8435	2.01696	8	Y	0.970625
P62937	PPIA	16.1156	1.92014	8	Y	0.964375
P04180	LCAT	16.1156	-1.71149	8	Y	0.964375
P36222	CHI3L1	15.5764	2.92374	10	Y	0.959375
P55072	VCP	15.4467	1.95808	8	Y	0.958125
P00558	PGK1	14.3563	1.96378	10	Y	0.946875
P06727	APOA4	14.2994	-1.30342	10	Y	0.94625
P02741	CRP	14.2427	4.89063	10	Y	0.945625
P09960	LTA4H	13.3784	1.04152	10	Y	0.935625
P18065	IGFBP2	13.3268	1.78146	10	Y	0.935
P60174	TPI1	13.0227	2.51428	12	Y	0.93125
P11142	HSPA8	12.9729	1.99384	10	Y	0.930625
P35858-2	IGFALS	12.9233	-0.967995	10	N	0.93
P18669	PGAM1	12.874	1.96659	10	Y	0.929375
P06396	GSN	12.6308	-0.886184	10	N	0.92625
P05154	SERPINA5	12.6308	-0.946525	10	N	0.92625
P19827	ITIH1	12.5352	-0.496792	10	N	0.925
P01008	SERPINC1	12.4877	-0.908049	12	N	0.924375
P02452	COL1A1	12.2534	1.26514	12	Y	0.92125
O14791-2	APOL1	12.1153	-1.39445	12	Y	0.919375
P08697	SERPINF2	11.7118	-0.754864	12	N	0.91375
P23528	CFL1	11.5373	2.34014	12	Y	0.91125
P06733	ENO1	11.4942	2.07117	12	Y	0.910625
P17936-2	IGFBP3	11.3232	-0.935359	12	N	0.908125
P02753	RBP4	11.3232	-0.974597	12	N	0.908125
P18206	VCL	10.6263	1.11643	14	Y	0.8975
P18428	LBP	10.4689	1.0659	14	Y	0.895
P07339	CTSD	10.4689	0.902511	14	N	0.895
P62979	RPS27A	10.4299	1.71101	14	Y	0.894375
P00338-3	LDHA	10.2753	0.891143	14	N	0.891875
Q9Y490	TLN1	10.123	1.96302	14	Y	0.889375
P30041	PRDX6	10.0852	1.83182	14	Y	0.88875
Q8NBJ4	GOLM1	9.86161	1.28695	14	Y	0.885
P54108-3	CRISP3	9.75158	-1.58844	14	Y	0.883125
P00742	F10	9.6427	-0.699323	14	N	0.88125
P02748	C9	9.49929	0.648707	16	N	0.87875
P48740-2	MASP1	9.42832	-0.884721	16	N	0.8775
Q06830	PRDX1	9.35783	1.75708	16	Y	0.87625
P29401-2	TKT	9.253	1.31278	16	Y	0.874375
P05090	APOD	9.08063	-1.03174	16	Y	0.87125
P00739-2	HPR	9.08063	-1.9661	16	Y	0.87125
P28066	PSMA5	9.01249	1.25173	16	Y	0.87
P63104	YWHAZ	8.91112	1.89667	16	Y	0.868125
O43866	CD5L	8.87756	-0.993997	16	N	0.8675
P55290-4	CDH13	8.8441	-0.68255	16	N	0.866875
P00734	F2	8.67847	-0.774377	16	N	0.86375
Q13421-2	MSLN	8.64567	1.45344	16	Y	0.863125
P01344-3	IGF2	8.64567	-0.549057	16	N	0.863125
P08195-4	SLC3A2	8.58038	-0.60669	16	N	0.861875
P06276	BCHE	8.45107	-0.652092	18	N	0.859375
Q4LDE5	SVEP1	8.35517	1.29485	18	Y	0.8575
P05556-3	ITGB1	8.29175	-1.06735	18	Y	0.85625
P50395	GDI2	8.19737	1.69792	18	Y	0.854375
P07737	PFN1	8.10389	2.6961	18	Y	0.8525
P04070-2	PROC	8.07293	-0.554839	18	N	0.851875
Q12860	CNTN1	8.07293	-0.884052	18	N	0.851875
P37837	TALDO1	8.04206	1.42474	18	Y	0.85125
P19022	CDH2	8.01129	0.920062	18	N	0.850625
P21333-2	FLNA	7.88918	2.19498	18	Y	0.848125
P19823	ITIH2	7.73866	-0.421389	18	N	0.845
P80108	GPLD1	7.73866	-2.69401	20	Y	0.845
P03952	KLKB1	7.61992	-0.517321	20	N	0.8425
P04040	CAT	7.59046	1.52259	20	Y	0.841875
P13798	APEH	7.53182	1.18511	20	Y	0.840625
Q76LX8	ADAMTS13	7.53182	-0.645137	20	N	0.840625
P23284	PPIB	7.38679	1.38944	20	Y	0.8375
P03951	F11	7.30082	-0.646683	20	N	0.835625
P00488	F13A1	7.30082	-1.94339	20	Y	0.835625
P27487	DPP4	7.27234	-0.85742	20	N	0.835
P34932	HSPA4	7.24395	0.918915	20	N	0.834375
P22897	MRC1	7.13123	0.801188	20	N	0.831875
P10721	KIT	7.10327	-0.968476	22	N	0.83125
P04075-2	ALDOA	7.07538	0.864387	22	N	0.830625
P43251-2	BTD	7.07538	-0.615301	20	N	0.830625
P00918	CA2	6.99224	1.55504	22	Y	0.82875
P54802	NAGLU	6.93723	-1.5661	22	Y	0.8275
P30740	SERPINB1	6.90985	1.0744	22	Y	0.826875
P02042	HBD	6.82819	2.71126	22	Y	0.825
P02750	LRG1	6.74727	0.716538	22	N	0.823125
P49908	SELENOP	6.72045	-0.44131	22	N	0.8225
P22105-4	TNXB	6.69372	-0.565629	22	N	0.821875
Q12913	PTPRJ	6.69372	-0.612865	22	N	0.821875
P00441	SOD1	6.66706	1.76831	22	Y	0.82125
P24593	IGFBP5	6.66706	-0.970545	24	N	0.82125
Q9NQ79	CRTAC1	6.61399	-0.810636	22	N	0.82
Q9HC38	GLOD4	6.43071	1.52551	24	Y	0.815625
P07195	LDHB	6.40483	0.611965	24	N	0.815
P43652	AFM	6.37903	-0.524701	24	N	0.814375
Q9NS87	KIF15	6.37903	-0.527625	24	N	0.814375
P04406	GAPDH	6.35331	1.13533	24	Y	0.81375
P14151-2	SELL	6.2766	-0.813233	24	N	0.811875
P00390	GSR	6.25118	0.724656	24	N	0.81125
P55103	INHBC	6.25118	0.520958	24	N	0.81125
Q16610	ECM1	6.20057	-0.604782	24	N	0.81
P27797	CALR	6.17537	0.619363	24	N	0.809375
P27169	PON1	6.17537	-1.76792	26	Y	0.809375
P54289	CACNA2D1	6.02575	-0.899143	26	N	0.805625
P05362	ICAM1	6.00106	0.574666	24	N	0.805
P05452	CLEC3B	6.00106	-0.628692	26	N	0.805
P29622	SERPINA4	5.97645	-0.760317	24	N	0.804375
P68871	HBB	5.92745	2.06088	26	Y	0.803125
P00915	CA1	5.85448	1.43828	26	Y	0.80125
P32119	PRDX2	5.85448	1.38885	26	Y	0.80125
P06702	S100A9	5.85448	0.977498	26	N	0.80125
P02747	C1QC	5.8303	-0.921008	26	N	0.800625
Q06033	ITIH3	5.80619	0.565879	26	N	0.8
P09668	CTSH	5.78215	-0.71962	26	N	0.799375
P12955	PEPD	5.6867	-0.616521	26	N	0.796875
Q04756	HGFAC	5.663	-0.37048	26	N	0.79625
P68133	ACTA1	5.59235	1.26844	28	Y	0.794375
Q86VB7-2	CD163	5.52231	0.58456	28	N	0.7925
Q96KN2	CNDP1	5.52231	-0.646788	28	N	0.7925
P11047	LAMC1	5.3385	0.614311	30	N	0.7875
P11362	FGFR1	5.29321	-0.585881	28	N	0.78625
P17174	GOT1	5.22578	1.06437	30	Y	0.784375
P02743	APCS	5.15893	0.441874	30	N	0.7825
P26038	MSN	5.13678	0.594904	30	N	0.781875
P01031	C5	5.11469	0.305562	30	N	0.78125
P13591	NCAM1	5.09267	-0.528349	30	N	0.780625
P13473-3	LAMP2	4.91877	-0.785973	32	N	0.775625
P62258	YWHAE	4.89731	0.56688	32	N	0.775
P22792	CPN2	4.89731	-0.330237	32	N	0.775
Q9NPY3	CD93	4.87592	0.455804	32	N	0.774375
P09172	DBH	4.87592	-0.776251	34	N	0.774375
Q02818	NUCB1	4.83333	1.06912	32	Y	0.773125
P10586	PTPRF	4.79098	0.503776	32	N	0.771875
P04004	VTN	4.79098	-0.380504	32	N	0.771875
Q99453	PHOX2B	4.7699	-0.949912	32	N	0.77125
Q13508	ART3	4.72792	-0.596117	34	N	0.77
P10909-2	CLU	4.66541	-0.341083	34	N	0.768125
Q9UEW3	MARCO	4.54203	0.531408	36	N	0.764375
P04196	HRG	4.54203	-0.622884	34	N	0.764375
Q9UBQ6	EXTL2	4.54203	-0.630815	34	N	0.764375
Q13228-4	SELENBP1	4.48114	1.3246	36	Y	0.7625
P04275	VWF	4.44085	0.910134	36	N	0.76125
P06744-2	GPI	4.36097	0.742178	36	N	0.75875
Q92820	GGH	4.34115	0.479135	36	N	0.758125
Q93063-3	EXT2	4.32138	-0.934787	36	N	0.7575
Q9H4A9	DPEP2	4.30167	-0.71865	36	N	0.756875
P07602-3	PSAP	4.26243	0.92984	38	N	0.755625
P30043	BLVRB	4.2429	1.31563	38	Y	0.755
P02786	TFRC	4.18464	-0.861848	40	N	0.753125
P15151	PVR	4.0507	-0.53337	40	N	0.74875
P22352	GPX3	4.03179	-0.515103	40	N	0.748125
P00746	CFD	4.01293	-0.450148	40	N	0.7475
P80188	LCN2	3.99413	0.73634	40	N	0.746875
P02746	C1QB	3.99413	-0.774588	40	N	0.746875
Q9BXR6	CFHR5	3.93807	0.363828	40	N	0.745
Q9Y6Z7	COLEC10	3.90098	-0.515383	40	N	0.74375
Q8IZF2	ADGRF5	3.88251	-0.482657	42	N	0.743125
P02751	FN1	3.8641	-0.811484	42	N	0.7425
Q06323-2	PSME1	3.77287	0.429084	44	N	0.739375
P05109	S100A8	3.75478	0.88483	44	N	0.73875
P15144	ANPEP	3.73675	-0.410581	44	N	0.738125
P01042-2	KNG1	3.73675	-1.16581	44	N	0.738125
Q8WWZ8	OIT3	3.70085	0.680929	44	N	0.736875
O43157	PLXNB1	3.68299	-0.660535	44	N	0.73625
Q76L83	ASXL2	3.66517	-0.690346	44	N	0.735625
P02745	C1QA	3.64741	-1.22668	44	N	0.735
P78509	RELN	3.61205	0.857458	44	N	0.73375
P24821	TNC	3.59444	0.388243	46	N	0.733125
P02461	COL3A1	3.5769	-0.539569	46	N	0.7325
P07686	HEXB	3.52456	0.790679	46	N	0.730625
P17813	ENG	3.52456	-0.653139	46	N	0.730625
Q14624-2	ITIH4	3.50723	-0.376938	46	N	0.73
P08709	F7	3.50723	-0.421479	46	N	0.73
Q7Z7M0	MEGF8	3.50723	-0.570914	46	N	0.73
Q86UD1	OAF	3.47271	0.401589	48	N	0.72875
Q6UXB8	PI16	3.4384	-0.62553	48	N	0.7275
O00391	QSOX1	3.42132	-0.294801	48	N	0.726875
P24592	IGFBP6	3.40429	-0.41917	48	N	0.72625
P09871	C1S	3.38732	-0.265971	48	N	0.725625
P07333	CSF1R	3.31994	-0.518545	50	N	0.723125
P00747	PLG	3.26994	-0.366874	50	N	0.72125
P22692	IGFBP4	3.23686	0.336427	52	N	0.72
Q9NZP8	C1RL	3.2204	-0.466998	52	N	0.719375
P01011	SERPINA3	3.17131	0.268863	54	N	0.7175
Q6YHK3	CD109	3.12267	-0.414496	54	N	0.715625
O00533-2	CHL1	3.05852	-0.358764	56	N	0.713125
P08253	MMP2	3.04261	-0.374256	56	N	0.7125
Q04721	NOTCH2	2.94817	-0.484061	58	N	0.70875
P00450	CP	2.9326	0.188073	58	N	0.708125
P15169	CPN1	2.9016	-0.374893	58	N	0.706875
O75636	FCN3	2.82497	-0.443459	60	N	0.70375
Q15582	TGFBI	2.76453	-0.306316	62	N	0.70125
P11226	MBL2	2.76453	-0.485235	64	N	0.70125
P04066	FUCA1	2.7197	-0.461475	64	N	0.699375
P69905	HBA1;	2.67529	1.73132	64	N	0.6975
Q12841	FSTL1	2.67529	0.457018	64	N	0.6975
O75882	ATRN	2.64593	-0.518391	66	N	0.69625
Q92954-3	PRG4	2.60223	0.407888	66	N	0.694375
Q14520	HABP2	2.57333	-0.300661	68	N	0.693125
P60709	ACTB	2.53033	0.619352	68	N	0.69125
Q16706	MAN2A1	2.53033	0.217157	70	N	0.69125
P16070	CD44	2.51609	-0.260372	70	N	0.690625
P13598	ICAM2	2.48775	-0.282303	70	N	0.689375
Q9BTY2	FUCA2	2.45959	-0.383778	70	N	0.688125
P55056	APOC4	2.39	0.829713	78	N	0.685
Q07075	ENPEP	2.39	-0.439921	74	N	0.685
Q8NBP7	PCSK9	2.32154	-0.329537	76	N	0.681875
Q9BY67-3	CADM1	2.29447	0.388588	78	N	0.680625
Q9P232	CNTN3	2.29447	-0.396615	78	N	0.680625
P07738	BPGM	2.17488	0.769399	84	N	0.675
P25311	AZGP1	2.12288	-0.220777	86	N	0.6725
P08571	CD14	2.10999	0.198727	88	N	0.671875
Q8WZ75	ROBO4	1.98348	0.409347	92	N	0.665625
P01019	AGT	1.98348	-0.201201	92	N	0.665625
Q7Z7G0	ABI3BP	1.93409	-0.35543	96	N	0.663125
Q14766-4	LTBP1	1.92185	1.70906	100	N	0.6625
P12111	COL6A3	1.92185	-0.522576	96	N	0.6625
P01042	KNG1	1.89749	-0.575823	98	N	0.66125
P02749	APOH	1.88538	-0.216765	98	N	0.660625
P02760	AMBP	1.87331	-0.236598	100	N	0.66
P07996	THBS1	1.86128	1.56905	104	N	0.659375
P30101	PDIA3	1.83735	0.742058	102	N	0.658125
Q08380	LGALS3BP	1.83735	0.325503	102	N	0.658125
P04003	C4BPA	1.82545	0.123154	104	N	0.6575
P09486	SPARC	1.81359	2.07084	108	N	0.656875
P01033	TIMP1	1.76657	0.357757	108	N	0.654375
P00740	F9	1.74331	0.158599	112	N	0.653125
P61916	NPC2	1.72022	0.239171	110	N	0.651875
Q9UGM5	FETUB	1.72022	-0.234474	112	N	0.651875
Q9UBG0	MRC2	1.72022	-0.431468	110	N	0.651875
P07359	GP1BA	1.68589	0.297577	114	N	0.65
Q13867	BLMH	1.66321	0.326047	116	N	0.64875
Q12805	EFEMP1	1.6295	0.216238	118	N	0.646875
Q99784	OLFM1	1.61835	-0.35068	120	N	0.64625
P05160	F13B	1.60723	-0.371838	122	N	0.645625
Q16853	AOC3	1.60723	-0.436393	120	N	0.645625
Q14624	ITIH4	1.59616	0.334753	122	N	0.645
P20774	OGN	1.59616	0.207053	124	N	0.645
P00751	CFB	1.57414	0.147026	124	N	0.64375
O75144-2	ICOSLG	1.55228	-0.209287	126	N	0.6425
Q01459	CTBS	1.55228	-0.242845	126	N	0.6425
P02649	APOE	1.53058	0.226771	132	N	0.64125
P07858	CTSB	1.51979	0.644099	130	N	0.640625
P19320	VCAM1	1.51979	0.422781	130	N	0.640625
P61769	B2M	1.51979	-0.667242	134	N	0.640625
P01833	PIGR	1.51979	-0.719789	130	N	0.640625
P61626	LYZ	1.4559	-1.03946	138	N	0.636875
P23470	PTPRG	1.44539	-0.218682	138	N	0.63625
Q15113	PCOLCE	1.41411	-0.183304	142	N	0.634375
P11021	HSPA5	1.41411	-0.210628	144	N	0.634375
P49747	COMP	1.40376	-0.370893	144	N	0.63375
P33151	CDH5	1.39345	-0.25839	146	N	0.633125
P16930	FAH	1.38318	0.790534	146	N	0.6325
P05121	SERPINE1	1.38318	0.659433	150	N	0.6325
P02655	APOC2	1.36276	0.474762	150	N	0.63125
P43121	MCAM	1.36276	-0.23274	150	N	0.63125
P81605-2	DCD	1.35261	0.337353	154	N	0.630625
Q9BQ51	PDCD1LG2	1.35261	-0.232608	150	N	0.630625
P05546	SERPIND1	1.35261	-0.266546	150	N	0.630625
Q17R98	ZNF827	1.31239	0.598484	158	N	0.628125
Q9Y5Y7	LYVE1	1.31239	-0.226863	160	N	0.628125
Q9UHG3	PCYOX1	1.30243	-0.611679	162	N	0.6275
O95479	H6PD	1.29252	0.369008	160	N	0.626875
Q6UX71	PLXDC2	1.24351	-0.279728	168	N	0.62375
Q13332-2	PTPRS	1.24351	-0.282662	170	N	0.62375
P07998	RNASE1	1.205	0.317581	176	N	0.62125
P35916	FLT4	1.205	-0.182667	176	N	0.62125
P08519	LPA	1.18598	0.492224	180	N	0.62
P08185	SERPINA6	1.16711	-0.280755	184	N	0.61875
Q9NPG4	PCDH12	1.16711	-0.367634	184	N	0.61875
O43505	B4GAT1	1.15773	-0.245125	186	N	0.618125
Q9NPH3-5	IL1RAP	1.1114	-0.224405	196	N	0.615
P02656	APOC3	1.07502	-0.413342	204	N	0.6125
Q9NS71	GKN1	1.06602	-0.334195	208	N	0.611875
P16035	TIMP2	1.05706	-0.202043	210	N	0.61125
P28827-2	PTPRM	1.05706	-0.367706	208	N	0.61125
Q07954	LRP1	1.04813	-0.166804	212	N	0.610625
Q86TH1	ADAMTSL2	1.03924	0.187321	216	N	0.61
P0C0L4	C4A	1.02158	-0.280652	220	N	0.60875
P05019	IGF1	0.978059	-0.837361	234	N	0.605625
P07911-5	UMOD	0.969466	-0.356336	236	N	0.605
P26927	MST1	0.93546	-0.15017	248	N	0.6025
P07360	C8G	0.91034	-0.167071	256	N	0.600625
Q92859	NEO1	0.91034	-0.246511	256	N	0.600625
P48740	MASP1	0.885547	-0.155863	268	N	0.59875
Q9NY15	STAB1	0.869199	-0.386305	272	N	0.5975
P14543	NID1	0.861079	0.24808	276	N	0.596875
P01034	CST3	0.861079	0.0800543	280	N	0.596875
P07942	LAMB1	0.844946	0.157506	284	N	0.595625
P12259	F5	0.836934	-0.0943734	290	N	0.595
P22891-2	PROZ	0.828958	-0.19765	296	N	0.594375
Q9NZ08-2	ERAP1	0.821017	0.23207	298	N	0.59375
P36980	CFHR2	0.805242	0.262719	304	N	0.5925
Q13790	APOF	0.774119	0.264296	320	N	0.59
P25774	CTSS	0.774119	-0.232767	320	N	0.59
Q9UJJ9	GNPTG	0.766427	0.129954	328	N	0.589375
P12821	ACE	0.766427	-0.515829	324	N	0.589375
P0C0L5	C4B	0.758769	0.130919	332	N	0.58875
Q8TDX9	PKD1L1	0.758769	-0.539022	330	N	0.58875
P39060	COL18A1	0.751147	-0.0128612	338	N	0.588125
P14625	HSP90B1	0.743561	0.132926	342	N	0.5875
P07225	PROS1	0.728492	0.0884664	352	N	0.58625
Q03591	CFHR1	0.706151	0.0155059	370	N	0.584375
P12830	CDH1	0.676849	0.158809	388	N	0.581875
Q9UBR2	CTSZ	0.655236	0.115836	408	N	0.58
Q9Y5C1	ANGPTL3	0.6481	0.10832	416	N	0.579375
O14786	NRP1	0.633931	-0.145704	426	N	0.578125
P35542	SAA4	0.626898	-0.228195	436	N	0.5775
P00748	F12	0.626898	-0.300984	436	N	0.5775
P10646	TFPI	0.619899	-0.203548	442	N	0.576875
Q96PD5-2	PGLYRP2	0.585413	-0.160195	482	N	0.57375
Q14515	SPARCL1	0.571855	-0.226664	504	N	0.5725
P19021-5	PAM	0.571855	-0.257248	496	N	0.5725
P27918	CFP	0.565127	-0.458454	528	N	0.571875
P05062	ALDOB	0.545142	0.226669	536	N	0.57
P07358	C8B	0.531986	0.316876	558	N	0.56875
P20742	PZP	0.525458	0.174551	566	N	0.568125
Q12884	FAP	0.518963	-0.233403	576	N	0.5675
P00533	EGFR	0.518963	-0.24114	572	N	0.5675
P04114	APOB	0.512501	0.108554	586	N	0.566875
P33908	MAN1A1	0.506072	0.132798	596	N	0.56625
P02774-3	GC	0.499676	-0.0965844	606	N	0.565625
Q9UK55	SERPINA10	0.468189	-0.103579	670	N	0.5625
P24387	CRHBP	0.468189	-0.141793	670	N	0.5625
P35590	TIE1	0.449688	-0.302421	710	N	0.560625
Q12907	LMAN2	0.425474	0.144638	774	N	0.558125
Q15848	ADIPOQ	0.425474	-0.449145	778	N	0.558125
P11717	IGF2R	0.39593	-0.070036	866	N	0.555
Q9UBP4	DKK3	0.390116	0.0696904	884	N	0.554375
Q14126	DSG2	0.339219	0.104762	1100	N	0.54875
P35443	THBS4	0.339219	-0.233824	1102	N	0.54875
P35555	FBN1	0.306694	0.0875137	1294	N	0.545
Q14118	DAG1	0.306694	0.056568	1298	N	0.545
P26447	S100A4	0.306694	0.0119145	1312	N	0.545
P11279	LAMP1	0.296099	-0.0306446	1374	N	0.54375
P10643	C7	0.296099	-0.0812409	1366	N	0.54375
Q13822-3	ENPP2	0.285626	0.211156	1484	N	0.5425
O95497	VNN1	0.270146	0.0313267	1598	N	0.540625
O15031	PLXNB2	0.270146	0.0258658	1598	N	0.540625
Q9BWP8-10	COLEC11	0.265046	-0.128565	1638	N	0.54
P20851	C4BPB	0.259977	-0.0627462	1690	N	0.539375
P02775	PPBP	0.24495	1.2839	2044	N	0.5375
P05155-3	SERPING1	0.24495	0.0124814	1876	N	0.5375
Q9Y4L1	HYOU1	0.235082	0.104076	1992	N	0.53625
Q86SQ4-3	ADGRG6	0.235082	0.00704094	1998	N	0.53625
P36955	SERPINF1	0.225333	-0.0193059	2148	N	0.535
Q8IWV2	CNTN4	0.215703	-0.00436773	2346	N	0.53375
Q9UNW1	MINPP1	0.215703	-0.0815758	2302	N	0.53375
P13489	RNH1	0.206191	0.14462	2490	N	0.5325
Q6EMK4	VASN	0.201478	0.0450034	2582	N	0.531875
P02790	HPX	0.187518	0.0196932	2912	N	0.53
Q86U17	SERPINA11	0.182923	0.0678055	3038	N	0.529375
P08294	SOD3	0.182923	-0.0646351	3044	N	0.529375
P04217	A1BG	0.178356	-0.0185356	3172	N	0.52875
P23142-4	FBLN1	0.173819	-0.42778	3352	N	0.528125
P51884	LUM	0.164831	0.0151347	3636	N	0.526875
P80723	BASP1	0.155957	0.00116445	3996	N	0.525625
P98160	HSPG2	0.142861	-0.0462516	4696	N	0.52375
Q10588	BST1	0.134273	0.0675299	5374	N	0.5225
O00187	MASP2	0.121601	0.0417761	6204	N	0.520625
P00736	C1R	0.121601	-0.0365313	6176	N	0.520625
P10645	CHGA	0.113292	0.0687164	6996	N	0.519375
P07237	P4HB	0.0970092	-0.0490541	9252	N	0.516875
P40189	IL6ST	0.0970092	-0.0677176	9230	N	0.516875
O94985	CLSTN1	0.0850858	-0.00950057	11654	N	0.515
Q9UNZ2-5	NSFL1C	0.0734077	0.101306	15248	N	0.513125
Q13740	ALCAM	0.0582147	-0.00216963	23230	N	0.510625
Q9Y6R7	FCGBP	0.0544834	0.0316465	26320	N	0.51
P07357	C8A	0.0544834	0.0169273	26268	N	0.51
P24043	LAMA2	0.0544834	0.00191497	26516	N	0.51
P10153	RNASE2	0.0507787	0.159647	30104	N	0.509375
P41222	PTGDS	0.0507787	0.012043	30012	N	0.509375
P04278	SHBG	0.0507787	-0.0244826	29936	N	0.509375
Q9UNN8	PROCR	0.0507787	-0.0248161	30074	N	0.509375
Q9NZK5	ADA2	0.0362244	0.0444914	56156	N	0.506875
Q96IY4	CPB2	0.0291048	-0.044073	83530	N	0.505625
Q16270	IGFBP7	0.0220893	-0.0115665	137926	N	0.504375
O60888-2	CUTA	0.0220893	-0.0673463	137146	N	0.504375
Q13093	PLA2G7	0.0186204	-0.0296008	190124	N	0.50375
P42785-2	PRCP	0.0186204	-0.0314537	186684	N	0.50375
*: Assuming alpha = 0.05, power = 0.8
¶:|log2 fold-change| > 1 and Bonferroni corrected p-value < 0.05
NA: Not applicable
