# Supplementary material for: Plasma Protein Biomarkers Associated with Higher Ovarian Cancer Risk in BRCA1/2 Carriers
Source: Cancers (Basel). 2021 May 11;13(10):2300. doi: 10.3390/cancers13102300 (PMC8150736; doi:10.3390/cancers13102300)
Supplement: Supplementary file 1 [file cancers-13-02300-s001.zip › Supplementary table S4.xlsx]

## Sheet: Sheet1
Supplementary Table S4. Differentially abundant proteins between healthy subjects and ovarian cancer patients all carrying BRCA1/2 variants.
Uniprot Accession ID.	Gene Name	-log10 (adjusted p-value)	Log2 fold_change (OCvar/HPvar)	Minimal sample size *	Significance?¶	AUC
P07996	THBS1	10.8384	3.17764	6	Y	1
P02775	PPBP	10.8384	3.11844	6	Y	1
O14791-2	APOL1	10.8384	-1.82981	6	Y	1
P04180	LCAT	10.8384	-2.5758	6	Y	1
P00488	F13A1	10.8384	-4.11289	6	Y	1
P09486	SPARC	10.5373	4.60461	6	Y	0.9975
P04275	VWF	10.5373	1.79264	6	Y	0.9975
P08697	SERPINF2	10.5373	-1.02019	6	Y	0.9975
P00734	F2	10.5373	-1.27303	6	Y	0.9975
Q14766-4	LTBP1	10.2363	3.20754	6	Y	0.995
P80108	GPLD1	10.2363	-4.36716	6	Y	0.995
P06733	ENO1	9.99327	3.09576	6	Y	0.9925
P23284	PPIB	9.99327	2.21771	6	Y	0.9925
P06727	APOA4	9.99327	-1.48944	6	Y	0.9925
P27169	PON1	9.99327	-3.34832	6	Y	0.9925
P60174	TPI1	9.75918	2.98638	6	Y	0.99
P62937	PPIA	9.75918	2.36917	6	Y	0.99
P00558	PGK1	9.75918	2.26705	6	Y	0.99
Q99497	PARK7	9.75918	2.12616	6	Y	0.99
P18206	VCL	9.55961	1.36976	6	Y	0.9875
P62979	RPS27A	9.36124	2.50925	8	Y	0.985
P11142	HSPA8	9.36124	2.31227	8	Y	0.985
P09960	LTA4H	9.36124	1.49783	8	Y	0.985
P18669	PGAM1	9.01229	2.40402	8	Y	0.98
P07737	PFN1	8.85159	4.11038	8	Y	0.9775
Q4LDE5	SVEP1	8.85159	1.88519	8	Y	0.9775
P29401-2	TKT	8.85159	1.86469	8	Y	0.9775
P34932	HSPA4	8.54833	1.52336	8	Y	0.9725
P01008	SERPINC1	8.54833	-1.22769	8	Y	0.9725
P04040	CAT	8.4038	2.39571	8	Y	0.97
P13798	APEH	8.4038	1.64459	8	Y	0.97
P04075-2	ALDOA	8.26666	1.22343	8	Y	0.9675
Q13421-2	MSLN	8.1325	2.06235	8	Y	0.965
P32119	PRDX2	8.1325	1.99416	8	Y	0.965
P21333-2	FLNA	8.00331	3.05576	8	Y	0.9625
P36222	CHI3L1	8.00331	2.8325	8	Y	0.9625
Q06830	PRDX1	7.87694	2.57234	8	Y	0.96
Q9Y490	TLN1	7.87694	2.28133	8	Y	0.96
P05121	SERPINE1	7.75486	1.54386	8	Y	0.9575
P02765	AHSG	7.75486	-0.685667	8	N	0.9575
P05154	SERPINA5	7.75486	-1.06387	8	Y	0.9575
P30041	PRDX6	7.51884	2.08613	8	Y	0.9525
P68133	ACTA1	7.40476	1.98396	10	Y	0.95
P55072	VCP	7.40476	1.56129	10	Y	0.95
P19022	CDH2	7.40476	1.2595	10	Y	0.95
Q8NBJ4	GOLM1	7.2938	1.49596	10	Y	0.9475
P35858-2	IGFALS	7.2938	-0.819285	10	N	0.9475
P18065	IGFBP2	6.97445	2.0439	10	Y	0.94
P17174	GOT1	6.97445	1.94225	10	Y	0.94
P28066	PSMA5	6.87251	1.55143	10	Y	0.9375
P78509	RELN	6.77234	1.79994	10	Y	0.935
O43866	CD5L	6.77234	-1.25895	10	Y	0.935
P05090	APOD	6.77234	-1.35398	10	Y	0.935
P37837	TALDO1	6.57782	1.88201	10	Y	0.93
P50395	GDI2	6.48328	2.20469	10	Y	0.9275
P02748	C9	6.48328	0.684482	12	N	0.9275
P06744-2	GPI	6.39026	1.19796	10	Y	0.925
P23528	CFL1	6.29898	2.39948	12	Y	0.9225
P07602-3	PSAP	6.29898	1.58574	12	Y	0.9225
P19827	ITIH1	6.29898	-0.483357	10	N	0.9225
Q02818	NUCB1	6.12084	1.73336	12	Y	0.9175
P17936-2	IGFBP3	6.03391	-0.866762	12	N	0.915
P02786	TFRC	6.03391	-1.69087	12	Y	0.915
Q92820	GGH	5.94843	0.705311	12	N	0.9125
P00739-2	HPR	5.94843	-2.26601	12	Y	0.9125
P02042	HBD	5.86421	3.33211	12	Y	0.91
P07686	HEXB	5.78135	1.3671	12	Y	0.9075
P10586	PTPRF	5.78135	0.812805	12	N	0.9075
P00742	F10	5.78135	-0.875333	12	N	0.9075
P63104	YWHAZ	5.69968	2.42294	12	Y	0.905
P04406	GAPDH	5.69968	1.43812	12	Y	0.905
P22897	MRC1	5.69968	1.12051	12	Y	0.905
P01344-3	IGF2	5.69968	-0.613816	12	N	0.905
Q16706	MAN2A1	5.61927	0.469153	12	N	0.9025
P02753	RBP4	5.61927	-0.977947	12	N	0.9025
P00918	CA2	5.46191	1.8561	12	Y	0.8975
P55103	INHBC	5.46191	0.643783	14	N	0.8975
Q9HC38	GLOD4	5.3849	1.65815	14	Y	0.895
P03952	KLKB1	5.3849	-0.597146	14	N	0.895
P68871	HBB	5.309	2.42287	14	Y	0.8925
P10909-2	CLU	5.309	-0.535442	14	N	0.8925
P08195-4	SLC3A2	5.309	-0.558614	14	N	0.8925
P06702	S100A9	5.23412	1.14134	14	Y	0.89
P62258	YWHAE	5.23412	1.05726	14	Y	0.89
Q12841	FSTL1	5.23412	0.921588	14	N	0.89
Q13228-4	SELENBP1	5.16029	1.93788	14	Y	0.8875
P00390	GSR	5.16029	0.939213	14	N	0.8875
P02452	COL1A1	5.08744	1.15764	14	Y	0.885
P54108-3	CRISP3	5.08744	-1.71273	16	Y	0.885
Q16610	ECM1	5.01558	-0.782565	14	N	0.8825
P30740	SERPINB1	4.94466	1.37363	16	Y	0.88
P02741	CRP	4.87468	4.14975	14	Y	0.8775
P00915	CA1	4.87468	1.80315	14	Y	0.8775
P18428	LBP	4.7374	1.16476	16	Y	0.8725
Q8WZ75	ROBO4	4.67006	0.818488	16	N	0.87
P06396	GSN	4.67006	-0.614843	16	N	0.87
O95497	VNN1	4.53793	1.683	16	Y	0.865
P30043	BLVRB	4.53793	1.5871	16	Y	0.865
Q9BY67-3	CADM1	4.53793	0.739968	16	N	0.865
P11047	LAMC1	4.28331	0.771974	18	N	0.855
P04004	VTN	4.28331	-0.484913	18	N	0.855
P04070-2	PROC	4.28331	-0.564639	18	N	0.855
P02743	APCS	4.1003	0.563709	20	N	0.8475
P07195	LDHB	4.04073	0.780351	20	N	0.845
P49908	SELENOP	4.04073	-0.474535	18	N	0.845
P43251-2	BTD	4.04073	-0.535736	18	N	0.845
P24593	IGFBP5	4.04073	-0.900474	20	N	0.845
P07237	P4HB	3.98187	-0.682431	20	N	0.8425
P02461	COL3A1	3.92369	-0.765764	20	N	0.84
P01042-2	KNG1	3.92369	-1.58089	20	Y	0.84
P16930	FAH	3.86619	1.86456	20	N	0.8375
P09172	DBH	3.86619	-0.912356	20	N	0.8375
P80188	LCN2	3.80934	1.04754	20	N	0.835
P27797	CALR	3.80934	0.706079	20	N	0.835
P22792	CPN2	3.80934	-0.351902	20	N	0.835
P48740-2	MASP1	3.80934	-0.811736	20	N	0.835
Q06033	ITIH3	3.75316	0.639704	22	N	0.8325
Q08380	LGALS3BP	3.75316	0.632949	20	N	0.8325
P07339	CTSD	3.69762	0.752312	22	N	0.83
Q99453	PHOX2B	3.69762	-1.10295	20	N	0.83
P00441	SOD1	3.64271	1.71787	22	N	0.8275
Q14624-2	ITIH4	3.64271	-0.546124	22	N	0.8275
P26038	MSN	3.58842	0.741259	22	N	0.825
P24592	IGFBP6	3.58842	-0.629211	22	N	0.825
P01031	C5	3.53475	0.327816	22	N	0.8225
Q9UEW3	MARCO	3.48169	0.825556	22	N	0.82
P00338-3	LDHA	3.48169	0.799044	22	N	0.82
P03951	F11	3.48169	-0.596407	22	N	0.82
P07858	CTSB	3.42922	1.32292	22	N	0.8175
P24821	TNC	3.42922	0.529032	22	N	0.8175
Q9NS87	KIF15	3.32603	-0.518408	24	N	0.8125
P09668	CTSH	3.27529	-0.505965	24	N	0.81
P02656	APOC3	3.27529	-1.03596	24	N	0.81
P60709	ACTB	3.22512	0.972976	24	N	0.8075
P06276	BCHE	3.22512	-0.585133	24	N	0.8075
P15151	PVR	3.22512	-0.837767	24	N	0.8075
Q9NPY3	CD93	3.17551	0.555841	26	N	0.805
P19823	ITIH2	3.17551	-0.374994	26	N	0.805
Q86VB7-2	CD163	3.12644	0.602934	26	N	0.8025
P14151-2	SELL	3.12644	-0.915037	26	N	0.8025
P00736	C1R	3.07792	0.400477	26	N	0.8
P05362	ICAM1	3.02992	0.624254	26	N	0.7975
P02750	LRG1	2.98246	0.708358	28	N	0.795
P14543	NID1	2.98246	0.573726	28	N	0.795
Q10588	BST1	2.98246	-0.766737	28	N	0.795
Q03591	CFHR1	2.98246	-1.41817	28	N	0.795
O00187	MASP2	2.93551	0.499321	30	N	0.7925
Q12860	CNTN1	2.93551	-0.722404	28	N	0.7925
P07225	PROS1	2.88908	0.302347	28	N	0.79
Q9NZP8	C1RL	2.88908	-0.566559	28	N	0.79
Q9NQ79	CRTAC1	2.88908	-0.602601	28	N	0.79
P54802	NAGLU	2.79774	-1.56752	30	N	0.785
Q9UJJ9	GNPTG	2.75282	0.474214	30	N	0.7825
Q8WWZ8	OIT3	2.70838	0.811662	30	N	0.78
P10721	KIT	2.70838	-0.765252	32	N	0.78
Q13867	BLMH	2.66443	0.642416	32	N	0.7775
P69905	HBA1	2.62096	2.08726	32	N	0.775
Q96IY4	CPB2	2.62096	0.356414	32	N	0.775
P43652	AFM	2.62096	-0.427589	32	N	0.775
P05452	CLEC3B	2.62096	-0.499403	32	N	0.775
P01042	KNG1	2.62096	-1.02086	32	N	0.775
Q9H4A9	DPEP2	2.57796	-0.931044	32	N	0.7725
Q76LX8	ADAMTS13	2.53543	-0.403036	34	N	0.77
Q13822-3	ENPP2	2.49337	0.746095	36	N	0.7675
Q04721	NOTCH2	2.49337	-0.678695	34	N	0.7675
Q17R98	ZNF827	2.45176	1.27868	34	N	0.765
P98160	HSPG2	2.45176	0.290652	36	N	0.765
P08709	F7	2.41061	-0.437762	36	N	0.7625
P07333	CSF1R	2.41061	-0.59631	34	N	0.7625
P0C0L4	C4A	2.3699	-0.793185	36	N	0.76
P15144	ANPEP	2.25044	-0.312108	38	N	0.7525
P11362	FGFR1	2.25044	-0.433327	38	N	0.7525
P05556-3	ITGB1	2.25044	-0.698895	38	N	0.7525
O95479	H6PD	2.21148	0.79985	40	N	0.75
P55290-4	CDH13	2.21148	-0.343599	38	N	0.75
P61916	NPC2	2.17295	0.338338	40	N	0.7475
P01833	PIGR	2.17295	-1.06724	40	N	0.7475
P04003	C4BPA	2.09716	0.186128	44	N	0.7425
Q12913	PTPRJ	2.09716	-0.391128	42	N	0.7425
Q8NBP7	PCSK9	2.09716	-0.39282	44	N	0.7425
P07358	C8B	2.05989	0.892315	44	N	0.74
P12955	PEPD	2.05989	-0.456694	44	N	0.74
P30101	PDIA3	2.02303	1.25697	44	N	0.7375
P22692	IGFBP4	2.02303	0.364559	44	N	0.7375
P27487	DPP4	2.02303	-0.685131	46	N	0.7375
Q76L83	ASXL2	2.02303	-0.740946	44	N	0.7375
P07738	BPGM	1.98657	1.00389	48	N	0.735
Q9UGM5	FETUB	1.98657	-0.338287	46	N	0.735
P19320	VCAM1	1.95052	0.799108	46	N	0.7325
P07998	RNASE1	1.91487	0.607323	46	N	0.73
P07359	GP1BA	1.91487	0.402874	46	N	0.73
Q13332-2	PTPRS	1.91487	-0.582049	48	N	0.73
Q9Y5Y7	LYVE1	1.87961	-0.445189	48	N	0.7275
P54289	CACNA2D1	1.87961	-0.592835	48	N	0.7275
Q13790	APOF	1.84475	0.423349	50	N	0.725
Q9NZ08-2	ERAP1	1.81027	0.635478	50	N	0.7225
P01033	TIMP1	1.81027	0.578216	50	N	0.7225
P81605-2	DCD	1.81027	0.54932	50	N	0.7225
P00751	CFB	1.77618	0.229212	52	N	0.72
Q13508	ART3	1.77618	-0.475861	52	N	0.72
Q96KN2	CNDP1	1.77618	-0.479083	50	N	0.72
Q06323-2	PSME1	1.70915	0.4053	56	N	0.715
Q15582	TGFBI	1.70915	-0.288573	54	N	0.715
Q93063-3	EXT2	1.70915	-1.04799	54	N	0.715
P29622	SERPINA4	1.6762	-0.520626	56	N	0.7125
P22105-4	TNXB	1.64362	-0.293273	56	N	0.71
Q86TH1	ADAMTSL2	1.61141	0.496504	60	N	0.7075
Q6UX71	PLXDC2	1.61141	-0.42719	58	N	0.7075
P13591	NCAM1	1.57956	-0.354841	60	N	0.705
P00746	CFD	1.57956	-0.36943	60	N	0.705
P07942	LAMB1	1.54808	0.297241	62	N	0.7025
Q9P232	CNTN3	1.54808	-0.413276	62	N	0.7025
Q14126	DSG2	1.51697	0.359798	62	N	0.7
P12830	CDH1	1.51697	0.309106	62	N	0.7
Q04756	HGFAC	1.51697	-0.17467	62	N	0.7
Q6EMK4	VASN	1.48621	0.255316	64	N	0.6975
Q6UXB8	PI16	1.4558	-0.704391	68	N	0.695
P12259	F5	1.42575	-0.191886	68	N	0.6925
P11021	HSPA5	1.42575	-0.259684	70	N	0.6925
P33151	CDH5	1.39604	0.33973	70	N	0.69
P15169	CPN1	1.39604	-0.314085	70	N	0.69
Q9BTY2	FUCA2	1.39604	-0.318924	70	N	0.69
P35590	TIE1	1.36669	0.344746	74	N	0.6875
Q9UHG3	PCYOX1	1.36669	-0.418668	74	N	0.6875
P51884	LUM	1.33767	0.252142	74	N	0.685
P02745	C1QA	1.33767	-0.877232	74	N	0.685
P04066	FUCA1	1.28067	-0.372623	78	N	0.68
Q9UBQ6	EXTL2	1.28067	-0.505012	80	N	0.68
P11226	MBL2	1.28067	-0.528632	78	N	0.68
P08571	CD14	1.22502	0.223927	84	N	0.675
Q15113	PCOLCE	1.22502	-0.256396	82	N	0.675
P36980	CFHR2	1.19769	0.637212	86	N	0.6725
Q92954-3	PRG4	1.19769	0.385187	86	N	0.6725
P02649	APOE	1.17069	0.335694	92	N	0.67
Q9UNW1	MINPP1	1.17069	0.32026	88	N	0.67
P02747	C1QC	1.17069	-0.645631	88	N	0.67
P61769	B2M	1.17069	-0.768506	90	N	0.67
P10643	C7	1.14402	0.204644	92	N	0.6675
P26447	S100A4	1.14402	-0.372238	92	N	0.6675
Q9NY15	STAB1	1.11767	0.38103	96	N	0.665
P25774	CTSS	1.09164	-0.307057	98	N	0.6625
P01011	SERPINA3	1.06594	0.197857	104	N	0.66
P02790	HPX	1.06594	0.155274	102	N	0.66
Q86UD1	OAF	1.04055	0.260317	104	N	0.6575
O75882	ATRN	1.04055	-0.444824	108	N	0.6575
P40189	IL6ST	1.01547	0.261848	108	N	0.655
Q7Z7M0	MEGF8	1.01547	-0.375742	108	N	0.655
P00533	EGFR	1.01547	-0.563563	106	N	0.655
P02751	FN1	0.990715	-0.430091	110	N	0.6525
P35443	THBS4	0.966266	0.303585	114	N	0.65
P09871	C1S	0.966266	-0.138507	114	N	0.65
Q86U17	SERPINA11	0.942127	0.224096	120	N	0.6475
P00747	PLG	0.942127	-0.216032	118	N	0.6475
Q9Y4L1	HYOU1	0.918294	-0.186762	124	N	0.645
P05109	S100A8	0.894766	0.549373	132	N	0.6425
Q16270	IGFBP7	0.894766	0.206798	128	N	0.6425
P0C0L5	C4B	0.894766	0.196575	128	N	0.6425
P20774	OGN	0.87154	0.226413	132	N	0.64
Q8IZF2	ADGRF5	0.87154	-0.331281	130	N	0.64
Q9UNZ2-5	NSFL1C	0.825988	0.480069	140	N	0.635
P26927	MST1	0.825988	0.203558	144	N	0.635
Q9Y6Z7	COLEC10	0.825988	-0.372605	142	N	0.635
P19021-5	PAM	0.803658	0.251587	150	N	0.6325
P01034	CST3	0.803658	0.115674	150	N	0.6325
P04217	A1BG	0.803658	0.0946981	148	N	0.6325
O00391	QSOX1	0.803658	-0.141551	146	N	0.6325
Q9NPG4	PCDH12	0.803658	-0.330314	146	N	0.6325
P00450	CP	0.781622	0.143382	152	N	0.63
P13598	ICAM2	0.781622	-0.189382	152	N	0.63
Q6YHK3	CD109	0.781622	-0.344842	154	N	0.63
P36955	SERPINF1	0.759879	-0.0069671	164	N	0.6275
Q7Z7G0	ABI3BP	0.738426	-0.348411	166	N	0.625
Q12907	LMAN2	0.738426	-0.434626	164	N	0.625
P10153	RNASE2	0.717262	0.506817	174	N	0.6225
P00740	F9	0.717262	0.104038	178	N	0.6225
P35916	FLT4	0.717262	-0.20831	174	N	0.6225
P04196	HRG	0.717262	-0.23428	174	N	0.6225
P02760	AMBP	0.717262	-0.242687	172	N	0.6225
P02749	APOH	0.675791	-0.147386	188	N	0.6175
P25311	AZGP1	0.675791	-0.151102	190	N	0.6175
Q9UBR2	CTSZ	0.655481	0.188142	198	N	0.615
O94985	CLSTN1	0.655481	0.158454	202	N	0.615
P11279	LAMP1	0.655481	-0.399243	198	N	0.615
Q8IWV2	CNTN4	0.635451	0.0723805	212	N	0.6125
P13473-3	LAMP2	0.635451	-0.34209	210	N	0.6125
P05155-3	SERPING1	0.615701	-0.0599541	218	N	0.61
P80723	BASP1	0.615701	-0.356193	216	N	0.61
Q8TDX9	PKD1L1	0.615701	-0.719624	214	N	0.61
Q86SQ4-3	ADGRG6	0.596228	0.0910895	226	N	0.6075
Q12884	FAP	0.596228	-0.00324163	238	N	0.6075
O43157	PLXNB1	0.596228	-0.411754	228	N	0.6075
Q12805	EFEMP1	0.57703	0.147663	236	N	0.605
P16070	CD44	0.57703	-0.170016	234	N	0.605
P55056	APOC4	0.558105	0.370623	262	N	0.6025
Q96PD5-2	PGLYRP2	0.558105	0.168605	254	N	0.6025
P07911-5	UMOD	0.558105	0.128371	252	N	0.6025
O00533-2	CHL1	0.521069	-0.0922031	276	N	0.5975
P05160	F13B	0.521069	-0.284826	278	N	0.5975
P22891-2	PROZ	0.485105	0.230291	304	N	0.5925
Q13740	ALCAM	0.485105	0.192878	304	N	0.5925
P08185	SERPINA6	0.485105	-0.106103	306	N	0.5925
P24387	CRHBP	0.485105	-0.110236	306	N	0.5925
P05546	SERPIND1	0.485105	-0.263484	304	N	0.5925
O60888-2	CUTA	0.450197	0.192268	340	N	0.5875
P35555	FBN1	0.450197	0.186819	342	N	0.5875
Q15848	ADIPOQ	0.450197	0.173048	352	N	0.5875
O15031	PLXNB2	0.450197	0.0962053	352	N	0.5875
Q99784	OLFM1	0.450197	-0.18934	342	N	0.5875
P33908	MAN1A1	0.433136	0.190784	364	N	0.585
Q9BXR6	CFHR5	0.416333	0.126633	386	N	0.5825
P08294	SOD3	0.33614	0.332128	538	N	0.57
O43505	B4GAT1	0.33614	0.124953	538	N	0.57
P48740	MASP1	0.33614	0.0556062	542	N	0.57
Q9UNN8	PROCR	0.320853	0.0501706	582	N	0.5675
Q07954	LRP1	0.320853	-0.0736196	574	N	0.5675
P10646	TFPI	0.320853	-0.216252	574	N	0.5675
Q14624	ITIH4	0.305813	0.196501	622	N	0.565
P41222	PTGDS	0.276465	0.52972	732	N	0.56
P04278	SHBG	0.262153	0.213082	804	N	0.5575
P05062	ALDOB	0.262153	0.158764	808	N	0.5575
P07357	C8A	0.262153	0.0714185	796	N	0.5575
P05019	IGF1	0.262153	-0.0672577	834	N	0.5575
Q9NPH3-5	IL1RAP	0.262153	-0.0851191	804	N	0.5575
P08253	MMP2	0.262153	-0.0895678	792	N	0.5575
Q9BQ51	PDCD1LG2	0.262153	-0.0985954	798	N	0.5575
P02655	APOC2	0.262153	-0.158713	796	N	0.5575
P61626	LYZ	0.262153	-0.381914	796	N	0.5575
P13489	RNH1	0.248081	0.339739	870	N	0.555
Q9Y6R7	FCGBP	0.248081	-0.0897048	868	N	0.555
P22352	GPX3	0.234246	-0.0997835	954	N	0.5525
P39060	COL18A1	0.234246	-0.211725	976	N	0.5525
Q14520	HABP2	0.220647	-0.104109	1046	N	0.55
O14786	NRP1	0.19415	0.0480797	1302	N	0.545
O75144-2	ICOSLG	0.19415	-0.0372444	1302	N	0.545
Q01459	CTBS	0.181248	-0.0395954	1452	N	0.5425
P02774-3	GC	0.168574	0.0586166	1646	N	0.54
O75636	FCN3	0.168574	0.0290824	1654	N	0.54
P01019	AGT	0.168574	-0.0211869	1644	N	0.54
P27918	CFP	0.168574	-0.199709	1810	N	0.54
P08519	LPA	0.143906	0.117133	2168	N	0.535
P20851	C4BPB	0.143906	-0.0416675	2144	N	0.535
Q07075	ENPEP	0.143906	-0.0435772	2168	N	0.535
P43121	MCAM	0.131907	0.0710703	2516	N	0.5325
P12111	COL6A3	0.131907	-0.293909	2526	N	0.5325
P24043	LAMA2	0.108572	0.128334	3494	N	0.5275
P49747	COMP	0.108572	-0.056975	3484	N	0.5275
Q9UBG0	MRC2	0.108572	-0.135182	3522	N	0.5275
P02746	C1QB	0.108572	-0.303589	3642	N	0.5275
P23142-4	FBLN1	0.097232	-0.525545	4314	N	0.525
P42785-2	PRCP	0.0751974	-0.0228739	6624	N	0.52
Q16853	AOC3	0.0751974	-0.077542	6630	N	0.52
Q9NZK5	ADA2	0.0644993	0.0638896	8760	N	0.5175
Q9BWP8-10	COLEC11	0.0644993	0.00740828	8560	N	0.5175
Q14118	DAG1	0.0644993	-0.0137622	8608	N	0.5175
P16035	TIMP2	0.0644993	-0.0454361	8590	N	0.5175
Q9Y5C1	ANGPTL3	0.0644993	-0.0506447	8570	N	0.5175
P35542	SAA4	0.0644993	-0.0717156	8582	N	0.5175
P12821	ACE	0.0540113	-0.458331	12092	N	0.515
P07360	C8G	0.0437316	-0.0458144	16792	N	0.5125
P17813	ENG	0.0437316	-0.184863	17016	N	0.5125
Q14515	SPARCL1	0.0437316	-0.212726	17546	N	0.5125
P11717	IGF2R	0.0336584	0.0648799	26382	N	0.51
Q92859	NEO1	0.0336584	0.00076366	26334	N	0.51
P23470	PTPRG	0.0237897	-0.0124025	46990	N	0.5075
P00748	F12	0.0237897	-0.0406549	46970	N	0.5075
Q9UBP4	DKK3	0.0237897	-0.0750939	47626	N	0.5075
Q13093	PLA2G7	0.0141236	-0.00208342	107810	N	0.505
Q9NS71	GKN1	0.0141236	-0.018222	104990	N	0.505
P20742	PZP	0.0141236	-0.0464735	107216	N	0.505
Q9UK55	SERPINA10	0.0141236	-0.0643899	105504	N	0.505
P28827-2	PTPRM	0.0141236	-0.122564	105784	N	0.505
P14625	HSP90B1	0.0046581	-0.0309787	420546	N	0.5025
P10645	CHGA	0	0.0998403	Inf	N	0.5
P04114	APOB	0	-0.00460608	Inf	N	0.5
*: Assumming alpha = 0.05, power = 0.8
¶:|log2 fold-change| > 1 and Bonferroni corrected p-value < 0.05
NA: Not applicable
