# Supplementary material for: Plasma Protein Biomarkers Associated with Higher Ovarian Cancer Risk in BRCA1/2 Carriers
Source: Cancers (Basel). 2021 May 11;13(10):2300. doi: 10.3390/cancers13102300 (PMC8150736; doi:10.3390/cancers13102300)
Supplement: Supplementary file 1 [file cancers-13-02300-s001.zip › Supplementary table S5.xlsx]

## Sheet: Sheet1
Supplementary Table S5. A total of 80 plasma samples obtained for six ELISA verification tests.
Information								Plasma concentration (ng/mL)
Sample	Category	BRCA variant type	Mutation	Accession (NCBI ClinVar)	Intepretation (ClinVar)	Familiy history	Personal histroy	MRC1	SERPINC1	SERPINA5	CDH2	SPARC	THBS1
E_HN1	HPwt	NA	NA	NA	NA	NA	NA	98.71	385775	2845	3436.47	NA	NA
E_HN2	HPwt	NA	NA	NA	NA	NA	NA	56.78	391200	1451	3741.71	NA	NA
E_HN3	HPwt	NA	NA	NA	NA	NA	NA	68.99	286850	1653	3713.47	NA	NA
E_HN4	HPwt	NA	NA	NA	NA	NA	NA	77.78	285575	2083	3583.05	347.813	115357
E_HN5	HPwt	NA	NA	NA	NA	NA	NA	77.15	81625	932	5049.67	336.224	38964.5
E_HN6	HPwt	NA	NA	NA	NA	NA	NA	88.01	449450	1562	3110.83	353.392	NA
E_HN7	HPwt	NA	NA	NA	NA	NA	NA	127.25	178000	1355	5269.2	NA	160439
E_HN8	HPwt	NA	NA	NA	NA	NA	NA	73.93	202325	1519	3120.72	NA	NA
E_HN9	HPwt	NA	NA	NA	NA	NA	NA	141.8	429550	1529	4987.92	539.123	135259
E_HN10	HPwt	NA	NA	NA	NA	NA	NA	84.05	326725	1054	13715.9	402.664	143206
E_HN11	HPwt	NA	NA	NA	NA	NA	NA	89.65	311325	1365	4244.93	NA	NA
E_HN12	HPwt	NA	NA	NA	NA	NA	NA	100.38	360100	1246	15495	418.536	134700
E_HN13	HPwt	NA	NA	NA	NA	NA	NA	105.49	172700	1260	2939.28	NA	NA
E_HN14	HPwt	NA	NA	NA	NA	NA	NA	57.38	277975	1259	3405.01	NA	NA
E_HN15	HPwt	NA	NA	NA	NA	NA	NA	67.85	271800	1296	2880.16	458.532	88336
E_HN16	HPwt	NA	NA	NA	NA	NA	NA	106.93	294975	1534	11166	NA	NA
E_HN17	HPwt	NA	NA	NA	NA	NA	NA	68.93	325300	1374	5144.72	NA	NA
E_HN18	HPwt	NA	NA	NA	NA	NA	NA	146.96	231575	774	2630.48	416.913	122302
E_HN19	HPwt	NA	NA	NA	NA	NA	NA	162.63	362825	2092	4722.46	347.286	100731
E_HN20	HPwt	NA	NA	NA	NA	NA	NA	127.96	293375	1439	34209.1	384.961	109477
E_HP1	HPvar	BRCA1	c.5260G>T	RCV000112584.3	Pathogenic	Sister: ovarian cancer	NA	56.81	25875	629	4642.03	37.248	14627.5
E_HP2	HPvar	BRCA1	c.2183G>C	RCV000129301.6	Uncertain significance	Mother: ovarian cancer	NA	109.37	25825	693	2959.36	33.339	10528.7
E_HP3	HPvar	BRCA1	exon 5~9 deletion	NA	NA	Mother: ovarian cancer	NA	57.89	25275	1253	5932.04	25.952	5664.75
E_HP4	HPvar	BRCA1	c.4932_4933dup	VCV000254459.2	Pathogenic	Mother: obarian cancer, Cousin: breast cancer	NA	87.08	42025	2072	5968.75	36.759	5161.59
E_HP5	HPvar	BRCA1	c.824G>A	RCV000049159.4	Uncertain significance	Mother: ovarian cancer	NA	77.14	33700	1353	4241.47	NA	NA
E_HP6	HPvar	BRCA1	c.3756_3759delGTCT	RCV000167859.9	Pathogenic	Mother: leukemia Aunt: breast cancer	NA	72.36	24800	1043	4395.72	21.774	2217.98
E_HP7	HPvar	BRCA1	c.811G>A	VCV000055720.11	Conflicting interpretations of pathogenicity​	Mother: ovarian cancer	NA	77.65	38050	1491	4705	NA	NA
E_HP8	HPvar	BRCA1	c.3627dupA	RCV000048263.8	Pathogenic	Mother: ovarian cancer	NA	86.87	31775	1778	4787.28	NA	NA
E_HP9	HPvar	BRCA2	c.1909+22del	VCV000132782.4	Conflicting interpretations of pathogenicity​	Sister: ovarian cancer	NA	96.81	20100	1151	3860.62	68.665	24250
E_HP10	HPvar	BRCA2	c.8092G>A	VCV000038138.13	Conflicting interpretations of pathogenicity​	Aunt: breast cancer	NA	47.21	25125	1082	4758.8	16.329	276.56
E_HP11	HPvar	BRCA2	c.6952C>T	RCV000031658.8	Pathogenic	Grandmother: breast cancer, Aunt: breast cancer	NA	47.58	18850	1073	4457.4	23.849	5749.72
E_HP12	HPvar	BRCA2	c.5576_5579delTTAA	VCV000037975.12	Pathogenic	Sister: ovarian cancer	NA	157.25	28200	1438	4743.4	NA	NA
E_HP13	HPvar	BRCA2	c.7480C>T	VCV000038099.16	Pathogenic	Sister: ovarian cancer	NA	143.75	22400	929	4681.28	NA	NA
E_HP14	HPvar	BRCA2	c.5576_5579delTTAA	VCV000037975.12	Pathogenic	Mother: ovarian cancer	NA	63.34	21150	1084	4816.76	NA	NA
E_HP15	HPvar	BRCA2	c.1251_1252delinsA	VCV000267498.1	pathogenic	Grandmother: breast cancer, ovarian cancer, Mother: breast cancer, Two aunts: breast cancer	NA	93.41	32900	858	6373.9	NA	NA
E_HP16	HPvar	BRCA2	c.154C>T	VCV000037421.12	Conflicting interpretations of pathogenicity​	Mother: breast cancer	NA	115.88	31075	999	5573.93	59.27	14210.6
E_HP17	HPvar	BRCA2	c.4829_4830delTG	VCV000051721.8	Pathogenic	Mother: ovarian cancer	NA	53.22	18800	853	4417.24	75.591	30195.1
E_HP18	HPvar	BRCA2	c.3096_3110delAGATATTGAAGAACAinsT	RCV000481789.1	Pathogenic	Mother: breast cancer, ovarian cancer	NA	64.54	38825	1222	5455.88	NA	NA
E_HP19	HPvar	BRCA2	c.7408_7409delTT	RCV000256781.2	Pathogenic	Mother: ovarian cancer	NA	71.76	30675	846	4542.42	NA	NA
E_HP20	HPvar	BRCA2	c.7480C>T(p.Arg2494*)	VCV000038099.16	Pathogenic	Mother: ovarian cancer	NA	132.29	33475	749	4869.07	NA	NA
E_ON1	OCwt	NA	NA	NA	NA	NA	NA	18.14	16550	77	8841.16	309.312	84061.3
E_ON2	OCwt	NA	NA	NA	NA	NA	NA	40.67	21025	67	6240.37	NA	NA
E_ON3	OCwt	NA	NA	NA	NA	NA	NA	61.72	19925	2264	4890.96	NA	NA
E_ON4	OCwt	NA	NA	NA	NA	NA	NA	79.07	27150	2213	5118.04	376.505	69637.6
E_ON5	OCwt	NA	NA	NA	NA	NA	NA	69.74	22500	1076	7331.23	290.482	88451.2
E_ON6	OCwt	NA	NA	NA	NA	NA	NA	46.92	315550	1619	3329.47	385.146	104035
E_ON7	OCwt	NA	NA	NA	NA	NA	NA	38.88	291750	1116	5113.17	398.197	102589
E_ON8	OCwt	NA	NA	NA	NA	NA	NA	62.89	304275	1185	4644.7	453.893	125029
E_ON9	OCwt	NA	NA	NA	NA	NA	NA	120.96	348475	1212	3895.73	345.224	158901
E_ON10	OCwt	NA	NA	NA	NA	NA	NA	38.34	302975	1600	3800.36	421.072	62189.7
E_ON11	OCwt	NA	NA	NA	NA	NA	NA	49.03	281000	903	2860.85	NA	NA
E_ON12	OCwt	NA	NA	NA	NA	NA	NA	67.67	383975	667	4304.06	NA	NA
E_ON13	OCwt	NA	NA	NA	NA	NA	NA	59.14	439350	1181	6022.65	NA	NA
E_ON14	OCwt	NA	NA	NA	NA	NA	NA	22.11	172725	740	3870.94	NA	NA
E_ON15	OCwt	NA	NA	NA	NA	NA	NA	32.54	100100	703	5989.13	NA	NA
E_ON16	OCwt	NA	NA	NA	NA	NA	NA	90.49	313425	1279	2648.85	553.715	67072.1
E_ON17	OCwt	NA	NA	NA	NA	NA	NA	55.21	273400	1233	5495.81	NA	NA
E_ON18	OCwt	NA	NA	NA	NA	NA	NA	46.35	313700	797	2827.31	NA	87490.9
E_ON19	OCwt	NA	NA	NA	NA	NA	NA	93.27	361250	1500	3682.33	NA	NA
E_ON20	OCwt	NA	NA	NA	NA	NA	NA	95.19	243975	1324	3040.76	NA	NA
E_ON21	OCwt	NA	NA	NA	NA	NA	NA	78.63	360000	772	3603.86	NA	NA
E_OP1	OCvar	BRCA1	c.3430C>T	VCV000054883.1	Pathogenic	NA	Concurrent breast cancer	54.82	330650	969	3243.15	392.389	121366
E_OP2	OCvar	BRCA1	c.1480C>T	VCV000037415.8	Pathogenic	NA	NA	73.08	288350	828	4118.49	NA	NA
E_OP3	OCvar	BRCA1	c.3627dupA	VCV000037534.13	Pathogenic	NA	NA	56.32	258425	773	2250.55	NA	NA
E_OP4	OCvar	BRCA1	c.3430C>T	VCV000054883.1	Pathogenic	NA	Concurrent breast cancer	57.45	319950	1264	4087.38	445.376	77094.1
E_OP5	OCvar	BRCA1	p.V1833fs	VCV000125867.1	Pathogenic	NA	NA	81.66	314300	1132	2935.67	206.353	68334.6
E_OP6	OCvar	BRCA1	c.3627dupA	VCV000037534.13	Pathogenic	NA	NA	50.38	138775	1741	6704.58	216.608	21247.4
E_OP7	OCvar	BRCA1	c.3954dupT	VCV000462626.2	Pathogenic	NA	NA	37.83	505825	991	3026.48	307.129	109810
E_OP8	OCvar	BRCA1	p.N1272fs	VCV000055014.1	Pathogenic	NA	NA	86.73	293950	1018	2694.84	NA	NA
E_OP9	OCvar	BRCA2	c.1909+22del	VCV000132782.4	Conflicting interpretations of pathogenicity​	Sister: ovarian cancer	NA	73.27	26050	841	5365.91	NA	NA
E_OP10	OCvar	BRCA2	exon 12~13 duplication	NA	NA	NA	NA	31.11	7450	267	6075.48	327.988	71145.2
E_OP11	OCvar	BRCA2	c.7408_7409delTT	VCV000052319.1	Pathogenic	NA	NA	62.34	21825	369	4289.94	NA	NA
E_OP12	OCvar	BRCA2	p.R2494*	VCV000038099.16	Pathogenic	NA	NA	54.27	284050	439	2572.66	266.046	75783.8
E_OP13	OCvar	BRCA2	c.1399A>T	VCV000051118.6	Pathogenic	Sister: ovarian cancer, colon cancer	NA	93.97	218975	869	3542.26	NA	NA
E_OP14	OCvar	BRCA2	c.6600_6601delTT	VCV000052131.8	Pathogenic	NA	Concurrent breast cancer	34.41	368050	1166	4762.72	NA	NA
E_OP15	OCvar	BRCA2	c.6600_6601delTT	VCV000052131.8	Pathogenic	NA	Concurrent breast cancer	67.97	252700	892	3874.15	NA	NA
E_OP16	OCvar	BRCA2	c.7522>A	VCV000052347.13	Conflicting interpretations of pathogenicity​	NA	Concurrent breast cancer	47.75	245025	829	5428.93	473.756	34394.2
E_OP17	OCvar	BRCA2	c.8954-10C>T	VCV000037753.9	Uncertain significance	NA	Concurrent breast cancer	34.64	353825	1337	3875.54	550.333	28686.6
E_OP18	OCvar	BRCA2	c.7522>A	VCV000052347.13	Conflicting interpretations of pathogenicity​	Mother: breast cancer	NA	83.89	217075	869	7629.59	246.427	NA
E_OP19	OCvar	BRCA2	c.8954-10C>T	VCV000037753.9	Uncertain significance	Mother: ovarian cancer	NA	101.48	355475	1290	2910.26	278.536	44962.3
HPwt: Healthy subjects without BRCA1/2 carriers
HPvar: Healthy subjects with BRCA1/2 carriers
OCwt: Ovarian cancer patients without BRCA1/2 carriers
OCvar: Ovarian cancer patients with BRCA1/2 carriers
NA: Not applicable
