# Supplementary material for: Plasma Protein Biomarkers Associated with Higher Ovarian Cancer Risk in BRCA1/2 Carriers
Source: Cancers (Basel). 2021 May 11;13(10):2300. doi: 10.3390/cancers13102300 (PMC8150736; doi:10.3390/cancers13102300)
Supplement: Supplementary file 1 [file cancers-13-02300-s001.zip › Supplementary_figures.pdf]

Supplementary Materials

# Plasma Protein Biomarkers Associated with Higher Ovarian Cancer Risk in BRCA1/2 Carriers

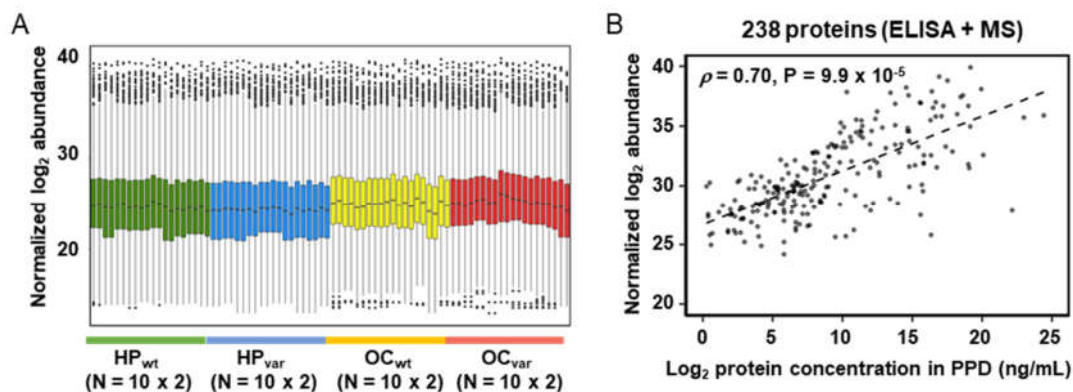

**Figure S1.** (A) Boxplots of normalized plasma protein abundances determined from duplicate LC-MS/MS runs of the 40 clinical samples (10 ovarian cancer (OC) patients and 10 healthy participates (HP) with or without *BRCA1/2* variants). (B) Scatter plot of the normalized log<sub>2</sub> abundance and log<sub>2</sub> immunoassay concentrations of 238 identified plasma proteins (Pearson correlation coefficient ( $\rho$ ): 0.7 and p-value:  $9.9 \times 10^{-5}$ ).

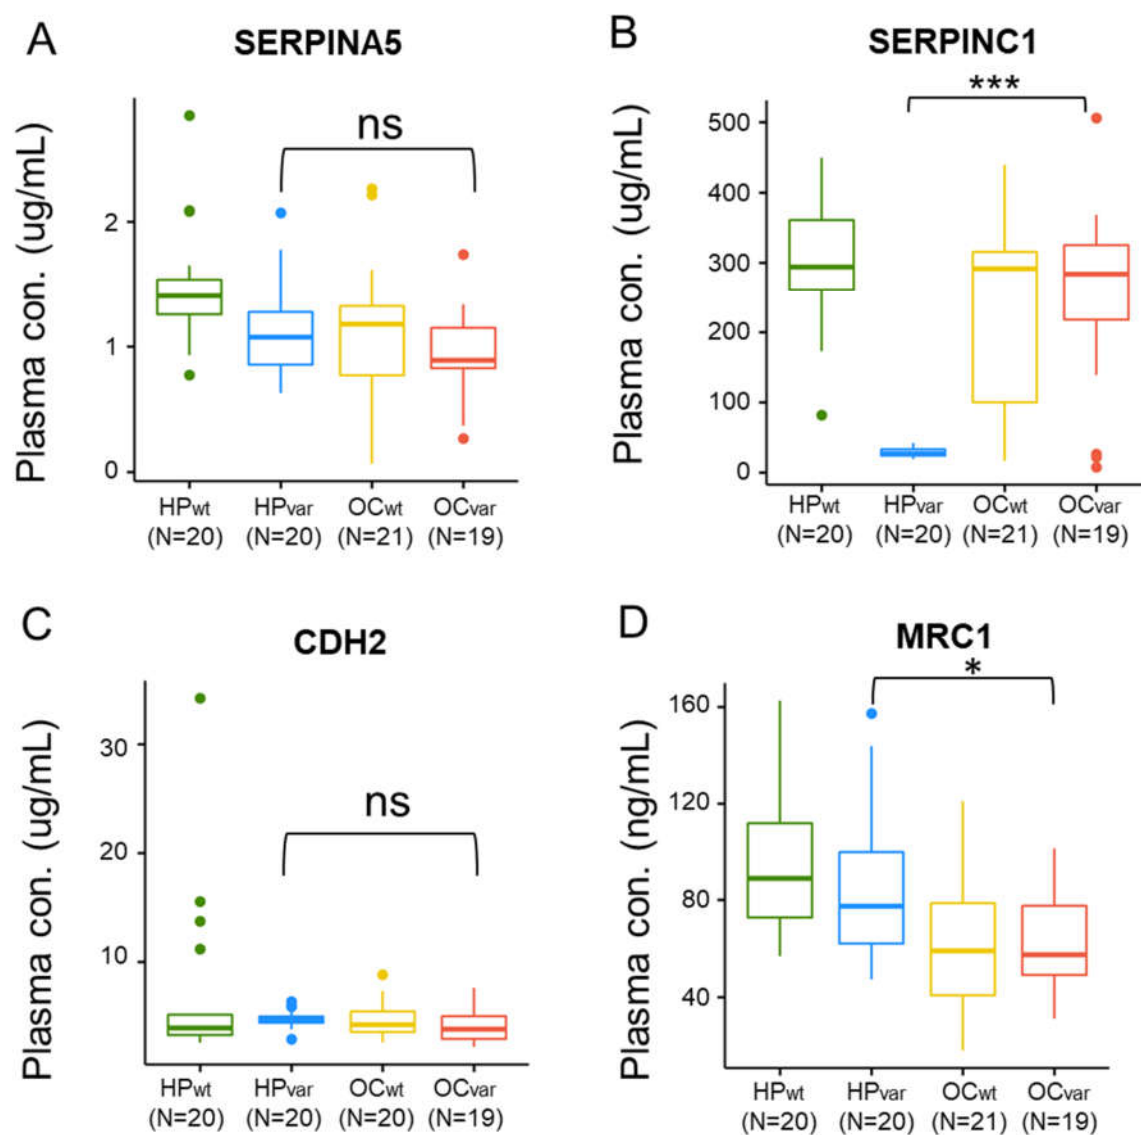

**Figure S2.** Boxplots of plasma protein concentrations determined by ELISA analysis (ng/mL) of SERPINA5 (A), SERPINC1 (B), CDH2 (C) and MRC1 (D) in the four study groups (HP<sub>wt</sub>, HP<sub>var</sub>, OC<sub>wt</sub> and OC<sub>var</sub>); ns: not significant, \*  $p < 0.05$ , \*\*\*  $p < 0.001$ .

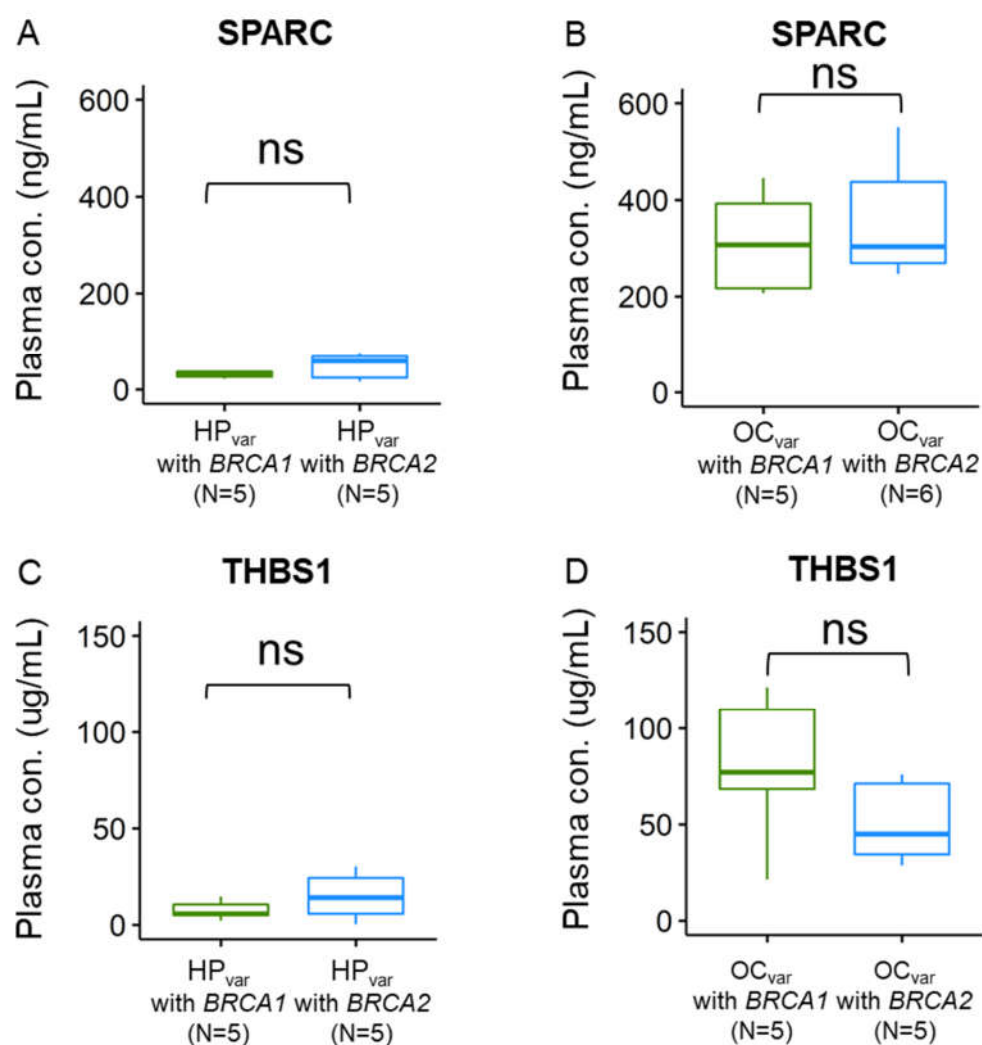

**Figure S3.** Boxplots of plasma protein concentrations determined by ELISA analysis of SPARC (ng/mL) in HP<sub>var</sub> (A) and OC<sub>var</sub> (B) and THBS1 (ug/mL) in HP<sub>var</sub> (C) and OC<sub>var</sub> (D) according to BRCA1 and BRCA2 variants; ns: not significant.
